1  
2  
3  
4  
5  
6  
7  
8  
9  
10  
11  
12  
13  
14  
15  
16  
17  
18  
19  
20

**Target localization across saccades and at fixation:  
Nontargets both facilitate and bias responses**

Xiaoli Zhang, and Julie D. Golomb

Department of Psychology, The Ohio State University, Columbus, OH 43210, USA

21 Correspondence should be addressed to:

22 Xiaoli Zhang ([zhang.4734@osu.edu](mailto:zhang.4734@osu.edu)) and Julie D. Golomb ([golomb.9@osu.edu](mailto:golomb.9@osu.edu))

## Nontargets facilitate and bias target localization responses

### 23 **Abstract**

24           The image on our retina changes every time we make an eye movement. To maintain  
25 visual stability across saccades, specifically to locate visual targets, we may use nontarget  
26 objects as “landmarks”. In the current study, we compared how the presence of nontargets affects  
27 target localization across saccades and during sustained fixation. Participants fixated a target  
28 object, which either maintained its location on the screen (sustained-fixation trials), or displaced  
29 to trigger a saccade (saccade trials). After the target disappeared, participants reported the most  
30 recent target location with a mouse click. We found that the presence of nontargets decreased  
31 response error magnitude and variability. However, this nontarget facilitation effect was not  
32 larger for saccade trials than sustained-fixation trials, indicating that nontarget facilitation might  
33 be a general effect for target localization, rather than of particular importance to saccadic  
34 stability. Additionally, participants’ responses were biased towards the nontarget locations,  
35 particularly when the nontarget-target relationships were preserved in relative coordinates across  
36 the saccade. This nontarget bias interacted with biases from other spatial references, e.g. eye  
37 movement paths, possibly in a way that emphasized non-redundant information. In summary, the  
38 presence of nontargets is one of several sources of reference that combine to influence (both  
39 facilitate and bias) target localization.

40

41 *Keywords:* target localization, landmarks, reference frames, visual stability, spatial perception

## 42 **Introduction**

43 Starting from the retina, visual information is organized spatially, according to its  
44 retinotopic (eye-centered) location. However, this raises a critical problem as we are constantly  
45 moving our eyes, and the image received by our retina is changing accordingly, which is not  
46 optimal for world-centered (spatiotopic) cognitive tasks. Hence, there is a challenge for our  
47 visual system to distinguish real changes in the world from changes on the retina purely caused  
48 by eye movements.

49 It has been proposed that we are able to use information from both extra-retinal and  
50 retinal sources to achieve visual stability, for example, to localize objects accurately. Extra-  
51 retinal sources include corollary discharge or efference copy signals from saccadic eye  
52 movements, including the idea that certain visual neurons can use this information to predictively  
53 remap their receptive fields, responding to stimuli in their future receptive field locations right  
54 before a saccade [1,2]. It has been argued that remapping might be able to compensate for  
55 saccade-induced motion, or link the retinal input before and after the saccade to maintain visual  
56 stability (reviewed in [3–5]).

57 Another source of stability -- the focus of this project -- is retinal information: i.e., visual  
58 information in the scene. One component of retinal information is the saccade target itself; it has  
59 been proposed that the saccade target provides critical information for visual stability [6–8].  
60 Another retinal component comes from other nontarget objects that appear in the visual field, for  
61 example a visual background [6] or frame [9], or other objects that can act as “landmarks” to  
62 influence target localization across saccades as well as at fixation [10–13].

63 Here we use the term “nontarget” to refer to visual objects in a display that are presented  
64 alongside a “target” object that acts as the fixation or the saccade goal. Researchers often use the

## Nontargets facilitate and bias target localization responses

65 terms “landmarks” or “distractors” to refer to objects presented alongside task targets that  
66 influence performance on various tasks. The term “landmark” has been mainly used in fields  
67 studying complex real-world tasks such as spatial navigation, and there is a large amount of  
68 evidence showing an important role of landmarks in performing navigation tasks (e.g., reviewed  
69 in [14]). The word “distractor” is often seen in visual attention studies, for example the influence  
70 of different types of distractor items during visual search (e.g., [15,16]). In order to avoid any  
71 confusion brought by the existing investigations of these two terms in other fields, here we use  
72 the term “nontargets”. Hypothetically these nontargets may work as “landmarks” (i.e.,  
73 facilitation) or “distractors” (i.e., impairment) in target localization tasks; we use “nontargets” to  
74 remain neutral and explore both of these possibilities in our study.

75       Previous studies have investigated the role of nontargets in visuospatial processing in  
76 different ways. When participants were asked to saccade to a stimulus flashed during an initial  
77 eye movement, their saccade was more accurate when an egocentric cue from a visual nontarget  
78 was available [17]. It was also found that the existence of a nontarget as a visual landmark can  
79 help guide eye movements to memorized target locations more precisely, showing nontarget  
80 facilitation for the memory-based saccade execution [18]. Moreover, the presence of stable  
81 nontarget landmarks has been shown to improve detection of target displacement during fixation  
82 [19] as well as across saccades ([20] using biological-motion stimuli; [21] using bystander  
83 configuration), although nontarget landmarks have failed to facilitate visuospatial tasks in some  
84 other domains, such as intrasaccadic perception of relative motion [22].

85       Importantly, nontargets may influence more than just localization accuracy. For example,  
86 in target displacement detection tasks, if nontargets displace transsaccadically, it can induce  
87 illusory target displacement [10]. In this study, minor displacements of the nontargets

## Nontargets facilitate and bias target localization responses

88 (“landmarks” in the original paper) systematically shifted participants’ perception of target  
89 displacement, demonstrating that nontargets have an important effect on post-saccadic  
90 localization processing, presumably by acting as a stable reference point in trans-saccadic  
91 memory; in other words, any change in visual information (specifically, relative position  
92 information; also see [23]) compared with pre-saccadic memory was perceived as target  
93 displacement, regardless of whether the target actually displaced. This landmark effect may be  
94 present both during trans-saccadic tasks and at fixation [12,24].

95       Even when stable, nontargets can also interfere with accurate localization of targets. A  
96 phenomenon called compression of space shows that objects tend to be systematically  
97 mislocalized around the time of a saccade, such that objects are perceived to be closer to the  
98 saccade endpoint than they actually are [25], and likewise the localization of saccade targets can  
99 be compressed towards nearby nontarget objects [26]. This mislocalization might result from a  
100 “convergent remapping” component of the neuronal remapping process across saccades [27–29],  
101 although some other studies suggest that saccade might not be necessary for compression to  
102 occur [30]. This bidirectional compression indicates that the location information of nontarget  
103 objects may be integrated with target localization, even if nontarget objects only flash briefly.  
104 The idea that nontarget location information can interact with or distort target localization has  
105 also been found when nontarget objects are continuously presented along with the target. For  
106 example, Sheth & Shimojo found that during sustained fixation participants mislocalized a  
107 peripheral target as closer to a salient, unfixated bar, which acted as a visual marker [13].

108       In sum, the previous literature has found that the presence of visual landmarks/nontargets  
109 may help to localize targets and detect target displacement, as well as potentially bias  
110 localization and perceived target displacement. However, most studies have focused on either

## Nontargets facilitate and bias target localization responses

111 one effect or the other, or when they have looked at both (e.g. [13]), it has been in the context of  
112 peripheral target localization. In the current study, we focus on the localization process of the  
113 fixation/saccade target. This is because the saccade target is often critically involved in cognitive  
114 processes after saccade execution, such as memory and action [31]; hence, processing location  
115 information of the saccade target is an essential cognitive function across saccades. Our first  
116 research goal is to ask whether the facilitation and bias effects can be integrated, and how  
117 nontarget effects interact with other influences, such as fixation/saccade-related factors. For  
118 example, It has been found that localization of a peripheral target can be systematically  
119 compressed towards both a nontarget landmark and the current fixation (i.e., “foveal bias”) [13].  
120 When the fixation point and the visual landmark were on the opposite side of the target, the total  
121 response bias was reduced, compared to when they were both on the same side of the target,  
122 suggesting that landmarks may facilitate performance by counteracting the foveal bias. Here we  
123 systematically investigate how the localization of saccade targets is influenced by nontargets,  
124 fixation-related biases, and their interaction (e.g., when they are on the same or opposite side of  
125 the target).

126         Second, many patterns of results mentioned above were found regardless of whether a  
127 saccade was made or planned. This brings up the question whether nontarget objects influence or  
128 facilitate target localization during saccades more than during sustained fixation, given that  
129 saccades pose unique challenges for perceptual stability [32]. The answer will tell us more about  
130 whether/how nontargets play a particularly important role in visual stability across saccades  
131 versus perception more generally. Therefore, we directly compare nontarget effects (facilitation  
132 and bias) between saccade and no-saccade trials.

## Nontargets facilitate and bias target localization responses

133           Finally, when nontargets are present during a saccade target localization task, there is  
134 also the issue of reference frames: does it matter if nontargets are presented in the same absolute  
135 location across the saccade (world-centered reference frame), or should they be manipulated in  
136 relative coordinates (eye- or saccade-target-relative reference frame)? Some studies have sought  
137 to avoid this issue; for example the nontargets were simply presented on the screen at the same  
138 time as the saccade target, but were absent during the initial fixation [10]. This design (which we  
139 refer to as the “Baseline” condition in our study) focused on the role of nontargets presented at  
140 the time the saccade was triggered. But in real-world processing, nontargets rarely just appear at  
141 the time of the saccade. In the current study, we include additional conditions where nontargets  
142 are visible from the beginning of the trial (before the saccade cue). Nontargets presented before  
143 and after the saccade could remain in the same absolute location on the environment/screen (the  
144 “Absolute” condition), or remain in the same location relative to the saccade target (the  
145 “Relative” condition). Although the former case is very common and intuitive in daily  
146 experiences, many studies have suggested that the latter contains the critical information for  
147 nontargets to take effect as landmarks, at least when using displacement judgment tasks ([10];  
148 also reviewed in [33]). It has also been found that there might be attention and/or memory  
149 benefits for relative spatial location or retinotopic coordinates across saccades, compared to  
150 absolute spatial location or spatiotopic coordinates [34–38], although other studies have found  
151 evidence for nonretinotopic processing [39–41]. However, it hasn’t been directly addressed  
152 whether stable nontargets in relative coordinates to the target would provide larger facilitation  
153 than in other reference frames.

154           In our project, we employed a modification of target localization tasks used in the  
155 literature, where instead of detecting trans-saccadic displacement, we simply had participants

## Nontargets facilitate and bias target localization responses

156 perform a target localization task by indicating target location with a mouse click (similar to  
157 [13]). Moreover, the more robust free-report task (compared to a two-alternative forced choice)  
158 allows us to measure with the response distribution not only whether target localization is  
159 facilitated or impaired under different nontarget conditions, but also whether and how much the  
160 localization reports are spatially biased by the presence of nontargets (and other factors). We  
161 tested target localization under the following conditions: Saccade presence (sustained-fixation vs  
162 saccade trials), Nontarget number (0, 1 or 2 nontargets), Congruency of the nontarget location  
163 with the initial fixation location (on the same side or opposite sides in relation to the final target)  
164 and Reference frame across saccades (Relative: the same location relative to the target; Absolute:  
165 the same absolute location on the display screen; and Baseline: not presented before the saccade  
166 target). Each reference frame condition was tested in separate experiments; within each  
167 experiment all other conditions were intermixed. We hypothesized that the presence of nontarget  
168 objects accompanying the target would both facilitate and perhaps bias target localization  
169 responses, with our main goal to investigate how this nontarget information interacts with  
170 saccade-related information, in different locations and reference frames.

171

## 172 **Materials and Methods**

173 *Participants.* An independent set of sixteen subjects participated in each of the three  
174 experiments (E1: 12 females, 4 males, mean age 19.06, range 18-23; E2: 9 females, 7 males,  
175 mean age 19.44, range 18-24; E3: 8 females, 8 males, mean age 20, range 18-24). All subjects  
176 reported normal or corrected-to-normal vision. They gave informed consent and were  
177 compensated with course credit or payment. The study protocols were approved by the Ohio  
178 State University Behavioral and Social Sciences Institutional Review Board.



## Nontargets facilitate and bias target localization responses

179 Sample size was chosen based on a power analysis of an independent pilot experiment  
180 similar to the current study. For the main effect of nontarget (NT) number (0, 1, 2) on response  
181 error magnitude, the pilot dataset (N=16) had an effect size of  $\eta_p^2=0.493$ , and the power to detect  
182 such an effect was estimated as .999. We thus set N=16 as the sample size for all experiments.

183

184 *Apparatus.* The experiment was run using Psychtoolbox [42] in Matlab (MathWorks).  
185 Stimuli were presented on a 21-in. CRT monitor with a refresh rate of 85 Hz. Participants were  
186 seated 61 cm in front of the monitor in a dark testing room, with a chinrest for eye-tracking  
187 purposes.

188

189 *Eye-tracking.* Eye positions were recorded throughout the experiment using an Eyelink  
190 1000 Eye Tracker at 500 Hz. Eye position data were used to ensure the participants kept their  
191 eyes on the target, and to measure saccade trajectories and latencies. If they were not fixating at  
192 the correct location, a “Fixation Error!” message was shown on the screen, the current trial failed  
193 immediately, and the next trial started. The failed trials were re-run in a random order later in the  
194 block. Saccades were identified and analyzed using custom Matlab code as described below.

195

196 *Task procedure.* Three experiments were run to look at the effect of nontargets on target  
197 localization across saccades and at fixation. The paradigm is shown in Fig 1.

198

199 ***Fig 1 Experiment Paradigm.*** A) Sample trial sequence for each of the three experiments. Each example  
200 shows a rightward saccade trial with 2 nontargets (white circles) on the right side. In E1 the nontargets  
201 appear at the same time as the saccade cue. In E2 and E3 the nontargets are present from the beginning  
202 of the trial and maintain the same locations relative to the saccade target (E2) or absolute screen

## Nontargets facilitate and bias target localization responses

203 *location (E3). After subjects successfully complete the saccade, the target is removed for a 200ms delay,*  
204 *and then participants make a response by moving the cursor and clicking at the remembered final target*  
205 *location. Feedback (a red cross at the reported location and a white cross at the correct location) was*  
206 *presented after response. B) Schematic indicating the different possible saccade patterns. Crosses*  
207 *indicate the three possible target locations, and arrows show saccade patterns; note that the actual target*  
208 *locations were jittered on each trial. C) Schematic showing different conditions of congruency on a*  
209 *sample saccade trial. Black crosses indicate the initial fixation and white crosses indicate the saccade*  
210 *target location. For a rightward saccade, NTs could appear either to the left or right of the final target.*  
211 *Left panel: when NTs and the initial fixation location were to the left of the final target location, this*  
212 *would be a same-side condition. Right panel: when NTs were to the right and the initial fixation location*  
213 *was to the left of the final target location, this would be an opposite-side condition. Dashed rectangle*  
214 *indicates the possible extent of the NT region; the actual nontargets (circles) were randomly presented in*  
215 *that rectangle region in each trial.*

216

217 For all experiments, participants began each trial by fixating a white cross sized  
218  $0.2^\circ \times 0.2^\circ$  (the target) on a constant gray background, RGB (127, 127, 127). The horizontal  
219 location of the target was randomized among three possible locations –  $4^\circ$  left of,  $4^\circ$  right of, and  
220 on the vertical midline, with  $0^\circ - 0.25^\circ$  additional random jitter. The vertical location was also  
221 jittered within  $0.25^\circ$  above or below the horizontal midline of the screen. Once participants were  
222 fixating (i.e., the eye location stayed within  $1.5^\circ$  range of the target), the target stayed visible for  
223 a variable period of 500 to 1000 ms. On saccade trials (50% of all trials), the target then jumped  
224 to an adjacent location to trigger a horizontal saccade of  $4^\circ$  (Fig 1B). The saccade end time was  
225 determined when the participants' eye position was within  $1.5^\circ$  range from the saccade target and  
226 the velocity of the eye movement was below  $30^\circ/\text{s}$  [43]. Trials failed immediately if the saccade  
227 was not completed within 3 s after the target jump.

## Nontargets facilitate and bias target localization responses

228           After the saccade was detected as completed, the target was removed for 200 ms. This  
229 means that the target was removed post-saccadically, but not midflight. Note that the goal of this  
230 design is to not to investigate trans-saccadic perception per se, but how target localization before  
231 and after saccades is affected by the presence of nontargets. On no-saccade trials, the target was  
232 removed from its initial location after a delay analogous to saccade latency (250 – 300 ms).  
233 Following this 200ms blank interval, a beep sound occurred to instruct participants to respond by  
234 moving the cursor to the remembered target location – the center of the cross. The cursor was  
235 presented on the screen at a random starting point  $0.5^\circ$  to  $1^\circ$  away from the target, to eliminate  
236 the effect of cursor location across trials. Participants clicked the left button to register their  
237 response. Feedback with the correct and reported location was shown for 1000 ms.

238           On some trials, nontarget objects (white empty circles of  $0.2^\circ$  radius) were also presented  
239 during the trial: trials were equally distributed among 0, 1, or 2 NTs. Participants were told that  
240 they should complete the task on the target cross, and that the circles were irrelevant to their task.  
241 In Experiment 1 (Baseline), nontargets appeared on the screen simultaneously with the saccade  
242 target (second fixation cue), or after an analogous delay on no-saccade trials. In Experiments 2 &  
243 3, nontargets appeared at the beginning of the trial, and remained on the screen throughout the  
244 trial in either “Relative” (Experiment 2) or “Absolute” (Experiment 3) reference frames. In  
245 Experiment 2, nontargets remained in the same location relative to the fixation cross (i.e., they  
246 moved with the saccade target; see Fig 1). In Experiment 3, nontargets remained in the same  
247 absolute location on the screen across the saccade.

248           In all three experiments, we designed the *NT location* conditions to be either to the left or  
249 right of the target’s final position, and thus either on the same side or opposite side as the initial  
250 fixation on saccade trials (Fig 1C). The actual NT locations were randomized for each trial

## Nontargets facilitate and bias target localization responses

251 within an imaginary vertical rectangle zone of  $1^\circ \times 2^\circ$ , centered  $2^\circ$  to the left or right of the target.  
252 This means that on trials with 2 NTs, these two NTs were both presented on the same side of the  
253 target. In the Baseline experiment, NTs were presented when the target appeared in its final  
254 position, centered  $2^\circ$  to the left or right of that final target location. In the Relative experiment,  
255 the NTs first appeared centered  $2^\circ$  to the left or right of the initial target location, and moved  
256 with the target to remain in the same relative location. Note that because the NTs moved with the  
257 target instead of the eyes, we call this condition “relative” instead of “retinotopic”. In the  
258 Absolute experiment, we included three different scenarios (S3A Fig). For rightward saccades,  
259 these scenarios were as follows: (a) the NTs appeared centered  $2^\circ$  to the right of the initial target  
260 position, which made them  $2^\circ$  to the left of the final target position (“near-near”); (b) the NTs  
261 appeared  $2^\circ$  to the left of the initial target position, meaning  $6^\circ$  to the left of the final target  
262 position (“near-far”); (c) the NTs appeared  $6^\circ$  to the right of the initial target position, meaning  
263  $2^\circ$  to the right of the final target position (“far-near”). It is an intrinsic confound in the Absolute  
264 experiment that the distance between NTs and the target could not be kept at  $2^\circ$  before and after  
265 a saccade and still include a mix of same-side and opposite-side conditions. Therefore, we  
266 included all three distance conditions described above to cover both same-side and opposite-side  
267 conditions in the Absolute experiment. For the main analyses, we collapsed across these three  
268 distance conditions. Separate results for the three distance conditions are shown in the  
269 supplementary materials.

270 For all experiments, participants completed a practice block, and then there were 12 main  
271 task blocks, 48 trials each. These 48 trials were equally distributed among the 2 saccade presence  
272 (no-saccade and saccade)  $\times$  3 NT number (0, 1 and 2 NTs)  $\times$  2 NT location (same and opposite  
273 side relative to initial fixation). A minimum of 8 blocks was set as a threshold for the data to be

## Nontargets facilitate and bias target localization responses

274 included in analyses (some participants could not complete the full 12 blocks in the allotted 1.5-  
275 hour session due to eye tracking difficulty). Each subject thus completed 32-48 trials per critical  
276 condition described above.

277

278 *Data processing and analyses.* Data were processed with custom Matlab (version 2015b)  
279 code and analyzed in JASP [44]. Trials with unreasonably long reaction time (>7s) or  
280 unreasonably large localization error (>1.5°) were discarded. The latter means that the situation  
281 where participants mistook the NT location as the target location was excluded. The discarded  
282 trials took up less than 0.2% of all trials in each experiment.

283 The conditions we analyzed included saccade presence (no-saccade and saccade), NT  
284 number (0, 1 and 2 NTs), and NT location (same and opposite side relative to initial fixation  
285 location). Each of these conditions was tested within each experiment (within-subjects), and  
286 compared across experiments (between-subjects), which varied reference frame.

287 Our primary goal was to assess how the above factors influence target localization  
288 performance; thus, the analyses primarily focus on the participants' mouse responses (though we  
289 include some additional analyses of eye-tracking data in the supplementary materials). We first  
290 investigated how making saccades influences target localization by comparing saccade versus  
291 no-saccade trials; then how NTs influence target localization by comparing trials with zero, one  
292 and two NTs; and finally, if/how these saccade and NT influences interact by analyzing saccade  
293 trials with NTs. We used three measurements to quantify target localization outcomes: 1) how  
294 accurate participants' responses were, by calculating the mean error magnitude as the distance  
295 (i.e., absolute value) between the reported and correct target location; 2) how variable  
296 participants' responses were, by calculating the root mean squared distance (RMSD) for each

## Nontargets facilitate and bias target localization responses

297 condition of interest for each subject; 3) how biased participants' responses were, by calculating  
298 the mean directional error vector along the horizontal axis along which saccades and NT  
299 locations were manipulated.

300 Specifically, RMSD was calculated using the formula:

$$301 \quad \text{Variability} = \sqrt{\frac{1}{n-1} \sum_{i=1}^n ((x_i - \bar{x})^2 + (y_i - \bar{y})^2)}$$

302 where for each subject each condition,  $(x_i, y_i)$  is the response coordinates for trial  $i$ ,  
303 centered around the actual target location;  $(\bar{x}, \bar{y})$  is the average coordinates of all responses in  
304 that condition;  $n$  is the number of trials, and the denominator  $(n-1)$  is the degree of freedom to  
305 get an unbiased estimate.

306 All of the above three measurements were calculated in units of visual angle. We used  
307 ANOVAs and t-tests for statistical analyses; effect sizes were calculated using  $\eta_p^2$  and Cohen's  
308  $d$ . Greenhouse-Geisser correction for violations of sphericity and Holm-Bonferroni correction  
309 for multiple comparisons were used when necessary.

310

## 311 **Results**

312 Our research question focused on how saccades and nontargets influence target  
313 localization independently and interactively.

314 A descriptive plot of participants' responses is depicted in Fig 2, where a scatter plot of  
315 participants' responses in each trial is plotted relative to the correct target location and saccade /  
316 NT directions, and 95% confidence ellipses of response error summarize the accuracy, precision,  
317 and bias of these responses (error ellipses calculated according to [45]). Statistical comparisons  
318 for each question of interest follow in the sections below.

## Nontargets facilitate and bias target localization responses

319

320 *Fig 2 Scatter plots of participants' localization errors across conditions in each experiment. X and y*  
321 *axes represent response error (in degree visual angle, dva) on horizontal and vertical axes respectively.*  
322 *(0,0) is the correct target location. Error ellipses show the 95% confidence interval of covariance*  
323 *between response errors on x and y axes. All trials were aligned according to the schematics above each*  
324 *column. The cross indicates the final target; the dashed rectangle indicates the range of nontarget (NT)*  
325 *location; the arrow indicates saccade direction. Note that the schematics are not drawn to scale or in the*  
326 *same scale as the scatter plots; for reference, the majority of responses were made within 0.5deg of the*  
327 *target, the closest NTs were 1.5deg from the target, and the initial fixation was 4deg from the target. The*  
328 *first column shows no-saccade trials. The second and third columns show saccade trials when NTs and*  
329 *the initial fixation location were on opposite sides of the target and when they were on the same side of*  
330 *the target, respectively. Rows correspond to the 3 experiments. Within each plot, data are shown for 0, 1,*  
331 *and 2 NTs, including all participants for visualization. N=16 for each experiment.*

332

### 333 **Accuracy of target localization**

334 We first looked at the effects of saccades and NTs on overall target localization accuracy,  
335 measured by the mean magnitude of error (distance) between the correct and reported locations.  
336 Note that this initial measure doesn't include information on which direction the participants  
337 made the error. Data were submitted to a 2 (saccade presence: 0, 1) × 3 (NT number: 0, 1, 2) × 3  
338 (experiment: 1, 2, 3) mixed-design ANOVA.

339 The results showed a significant main effect of saccade presence,  $F(1,45)=15.351$ ,  
340  $p<.001$ ,  $\eta_p^2=.254$ , indicating that the error magnitude was larger in saccade trials than no-saccade  
341 trials. There was also a main effect of NT number,  $F(1.503,67.662)=46.809$ ,  $p<.001$ ,  $\eta_p^2=.510$ ,  
342 that increasing the number of NTs decreased the error magnitude. There was no significant

## Nontargets facilitate and bias target localization responses

343 interaction between saccade presence and NT number,  $F(1.647,74.111)=0.059$ ,  $p=.913$ ,  $\eta_p^2=.001$ ,  
344 indicating that the influence of NTs on target localization accuracy was similar for both saccade  
345 and no-saccade trials.

346 Do these influences of NTs and saccades vary across our different experiments? In  
347 Experiment 1 (baseline), NTs were presented at the same time as the saccade target, whereas in  
348 Experiments 2 and 3 NTs were presented before the saccade target, in relative (same location  
349 relative to target) and absolute (same absolute location on screen) coordinates, respectively. We  
350 found a significant interaction between experiment and NT number,  $F(3.005,67.622)=4.201$ ,  
351  $p=.009$ ,  $\eta_p^2=.157$ , but no significant main effect of experiment nor interaction between saccade  
352 presence and experiment,  $F(2,45)=1.338$ ,  $p=.273$ ,  $\eta_p^2=.056$ ,  $F(2,45)=1.211$ ,  $p=.307$ ,  $\eta_p^2=.051$ .  
353 There was no significant three-way interaction between saccade presence, NT number and  
354 experiment,  $F(3.294,74.111)=1.833$ ,  $p=.143$ ,  $\eta_p^2=.075$ . Fig 3A illustrates the NT number  $\times$   
355 experiment interaction. The presence of NTs decreased error in all experiments, but this NT  
356 facilitation effect was greater for the baseline and relative conditions (E1 and E2) compared to  
357 the absolute condition (E3). Using the zero NT trials as a baseline for each experiment, we  
358 calculated the “NT facilitation” effect for NT1 and NT2 trials for each of the 3 experiments. A 2  
359 (NT number: 1, 2)  $\times$  2 (saccade presence: 0, 1)  $\times$  3 (experiment: 1, 2, 3) mixed-design ANOVA  
360 found a significant main effect of NT number,  $F(1,45)=6.914$ ,  $p=.012$ ,  $\eta_p^2=.133$ , showing greater  
361 facilitation with two nontargets than one nontarget, along with a main effect of experiment,  
362  $F(2,45)=5.206$ ,  $p=.009$ ,  $\eta_p^2=.188$ . Post hoc t-tests between experiments showed that NT  
363 facilitation was not significantly different between baseline and relative conditions,  $t(30)=-0.447$ ,  
364  $p=.658$ , Cohen’s  $d=-0.158$ , but that in both baseline and relative conditions facilitation effects  
365 were significantly larger than in the absolute condition ( $t(30)=-3.920$ ,  $p<.001$ , Cohen’s  $d=-1.386$



## Nontargets facilitate and bias target localization responses

366 and  $t(30)=-2.477, p=0.019$ , Cohen's  $d=-0.876$ , respectively). It is possible that some of these  
367 experiment effects could be driven by distance effects – i.e. in the absolute condition some  
368 nontargets were located further from the target (see methods). We then restricted Absolute trials  
369 to the subset that matched the distance of relative NTs (i.e., “near-near” condition), and we still  
370 found a significant difference between Absolute and Relative facilitation,  $F(1,15)=6.712$ ,  
371  $p=.020, \eta_p^2=.309$  (additional results in the supplementary materials).

372

373 *Fig 3 Target localization performance. Target localization error magnitude (A) and response variability*  
374 *(B) as a function of NT number, in each of the three experiments. Data are collapsed across saccade and*  
375 *no-saccade trials. N=16 for each experiment. Error bars are SEM.*

376

## 377 **Variability of responses**

378 We next examined another important measurement of target localization performance,  
379 the variability of the responses, quantified using RMSD.

380 We did similar analyses as above, using a 2 (saccade presence: 0, 1)  $\times$  3 (NT number: 0,  
381 1, 2)  $\times$  3 (experiment: 1, 2, 3) mixed-design ANOVA, and found similar patterns. There was a  
382 significant main effect of NT number,  $F(1.625,73.108)=52.783, p<.001, \eta_p^2=.540$ , where NTs  
383 reduced response variability. Making a saccade significantly increased response variability,  
384  $F(1,45)=13.133, p<.001, \eta_p^2=.226$ . There was no significant interaction between saccade  
385 presence and NT number,  $F(1.670,75.132)=2.059, p=.142, \eta_p^2=.044$ .

386 There was no significant interaction between saccade presence and experiment,  
387  $F(2,45)=0.955, p=.392, \eta_p^2=.041$ . The NT number  $\times$  experiment interaction was significant,  
388  $F(3.249,73.108)=3.984, p=.009, \eta_p^2=.150$ . As shown in Fig 3B, NT facilitation affected

## Nontargets facilitate and bias target localization responses

389 variability in a similar way as overall accuracy. NT facilitation was present in all three  
390 experiments, but was greater for the baseline and relative conditions (E1 and E2) compared to  
391 the absolute condition (E3),  $F(2,45)=5.503$ ,  $p=.007$ ,  $\eta_p^2=.197$ , and was greater for 2NT than  
392 1NT,  $F(1,45)=7.300$ ,  $p=.010$ ,  $\eta_p^2=.140$ . Similar to accuracy analyses above, when restricting to  
393 trials in which NT distance was comparable across experiments, Relative facilitation was still  
394 greater than Absolute facilitation,  $F(1,15)=7.405$ ,  $p=.016$ ,  $\eta_p^2=.331$ .

395

### 396 **Spatial response biases**

397         So far, we assessed the performance of target localization in terms of error magnitude and  
398 response variability, and found that the presence of nontargets decreased both measurements; i.e.  
399 nontargets improved target localization performance on both saccade and no-saccade trials.  
400 However, it should be noted that these two measurements ignored the directional information of  
401 participants' responses. That is, were errors randomly distributed around the correct location, or  
402 was there systematic variability? There could be two ways in which directional error might be  
403 informative here: First, there might be a difference in horizontal versus vertical error magnitudes  
404 (particularly because in our paradigm, saccade direction was only manipulated along the  
405 horizontal axis). Second, we can ask whether the saccade direction and/or location of the NTs on  
406 a given trial might systematically *bias* the reported target location, e.g. toward or away from the  
407 NTs or initial fixation.

408         To address the first question, we performed the same analysis as above for mean error  
409 magnitude, but now separately for horizontal and vertical error magnitude. The increase in error  
410 on saccade versus no-saccade trials happened only along the horizontal axis; interestingly,  
411 making a saccade actually decreased the error along vertical axis (horizontal:  $F(1,45)=28.288$ ,

## Nontargets facilitate and bias target localization responses

412  $p < .001$ ,  $\eta_p^2 = .386$ ; vertical:  $F(1,45) = 10.791$ ,  $p = .002$ ,  $\eta_p^2 = .193$ ). NT facilitation happened along  
413 both horizontal and vertical axes. However, the experiment  $\times$  NT interaction was only found  
414 along the horizontal axis (horizontal:  $F(3.017,67.893) = 5.009$ ,  $p = .003$ ,  $\eta_p^2 = .182$ ; vertical:  
415  $F(3.592,80.825) = 0.909$ ,  $p = .454$ ,  $\eta_p^2 = .039$ ). Similar patterns were found for response variability:  
416 making a saccade increased response variability only along the horizontal axis (horizontal:  
417  $F(1,45) = 18.362$ ,  $p < .001$ ,  $\eta_p^2 = .290$ ; vertical:  $F(1,45) = 0.740$ ,  $p = .394$ ,  $\eta_p^2 = .016$ ); and NT  
418 facilitation existed along both horizontal and vertical axes, but interacted with experiment only  
419 along the horizontal axis (horizontal:  $F(3.279,73.781) = 5.065$ ,  $p = .002$ ,  $\eta_p^2 = .184$ ; vertical:  
420  $F(3.782,85.098) = 0.542$ ,  $p = .695$ ,  $\eta_p^2 = .024$ ).

421 Because saccades were only executed along the horizontal axis, and the NT  $\times$  experiment  
422 interaction was also specific to the horizontal axis, for our second question (i.e., spatial bias), we  
423 focused primarily on horizontal directional error. To enable us to look at the joint influence of  
424 saccade and NT biases, we simplified the location of NTs into whether they were presented in  
425 the same horizontal direction as the initial fixation (Same) or opposite horizontal direction  
426 (Opposite).

427 *Does saccade direction bias target localization?* To isolate a potential saccade-related  
428 bias, we first restricted our analyses to trials with zero NTs (Fig 4B and 4C, when NT number is  
429 zero in saccade trials; also S1B Fig). We aligned each trial's data so that a positive error vector  
430 would mean bias towards the initial fixation location on saccade trials (and towards right on no-  
431 saccade trials). A 2 (saccade presence: 0, 1)  $\times$  3 (experiment: 1, 2, 3) mixed-design ANOVA  
432 found a significant main effect of making a saccade,  $F(1,45) = 54.863$ ,  $p < .001$ ,  $\eta_p^2 = .549$ , with  
433 participants' responses more biased on saccade than no-saccade trials. Post-hoc tests revealed  
434 that on saccade trials, target localization (mouse) responses were significantly biased towards the

## Nontargets facilitate and bias target localization responses

435 initial fixation location (compared to zero bias:  $t(47)=-7.482$ ,  $p<.001$ , Cohen's  $d=-1.080$ ), while  
436 the bias on no-saccade trials was not significantly different from zero  $t(47)=0.879$ ,  $p=.384$ ,  
437 Cohen's  $d=0.127$ . There was no significant main effect of or interaction with experiment,  
438  $F(2,45)=0.311$ ,  $p=.734$ ,  $\eta_p^2=.014$ ,  $F(2,45)=0.351$ ,  $p=.706$ ,  $\eta_p^2=.015$ , respectively. A  
439 supplementary analysis (S1 Fig) revealed that there was also a similar bias in saccade landing  
440 point, with the majority of saccade trials undershooting the target. However – critically – target  
441 localization (mouse response) was biased towards the initial fixation location regardless of actual  
442 saccade endpoint. We compared saccade undershoot and overshoot trials separately and found  
443 that for both saccade undershoot and overshoot trials, there was a significant localization bias in  
444 the direction of initial fixation in all experiments,  $t's \geq 2.802$ ,  $p's \leq .013$ , Cohen's  $d's \geq 0.700$ ; i.e.,  
445 saccade endpoint (undershoot or overshoot) impacted the magnitude of this bias,  $F(1,45)=9.102$ ,  
446  $p=.004$ ,  $\eta_p^2=.168$ , but did not drive the effect.

447

448 *Fig 4 Spatial response biases. A) Response biases on no-saccade trials (NT-related bias). Positive values*  
449 *mean biasing towards NT location (and towards right when NT number is zero). Bias increases with NT*  
450 *number. B) Response biases on saccade trials when NT location and initial fixation are on the opposite*  
451 *sides of the target. Positive values mean biasing towards the initial fixation location. When the NT*  
452 *number is zero, the positive values in three experiments indicate a saccade-related response bias towards*  
453 *the initial fixation. NTs on the opposite side counteract this bias. C) Response biases on saccade trials*  
454 *when NT location and initial fixation are on the same side of the target. As in B, when the NT number is*  
455 *zero, the positive values in three experiments indicate a saccade-related response bias towards the initial*  
456 *fixation. However, NTs on the same side add little to this bias.  $N=16$  for each experiment. Error bars are*  
457 *SEM.*

458

## Nontargets facilitate and bias target localization responses

459           *Do nontargets bias target localization?* Next, to explore the potential bias from  
460 nontargets alone, we looked at no-saccade trials, comparing zero, one or two NTs (Fig 4A). We  
461 aligned the data so that a positive error vector would mean bias towards the NTs (along  
462 horizontal axis). A 3 (NT number: 0, 1, 2)  $\times$  3 (experiment: 1, 2, 3) mixed-design ANOVA found  
463 a significant main effect of NT number,  $F(1.425, 64.144)=13.062$ ,  $p<.001$ ,  $\eta_p^2=.225$ . On trials  
464 where NTs were present, participants' responses were biased towards the NT location; the bias  
465 was significant for both 1NT and 2NT,  $t(47)=5.879$ ,  $p<.001$ , Cohen's  $d=0.849$ ,  $t(47)=9.242$ ,  
466  $p<.001$ , Cohen's  $d=1.334$ , respectively, and two NTs yielded a significantly larger bias than one,  
467  $t(47)=2.645$ ,  $p=.011$ , Cohen's  $d=0.382$ . There was no significant main effect of or interaction  
468 with experiment,  $F(2, 45)=1.791$ ,  $p=.179$ ,  $\eta_p^2=.074$ ,  $F(2.851, 64.144)=0.541$ ,  $p=.647$ ,  $\eta_p^2=.023$ ,  
469 respectively.

470           *Joint influence of saccade and NTs.* Now the key question is: how do these two sources  
471 of bias *interact* when both are present? E.g., if the biases induced by the saccade and the NTs are  
472 in the same direction, do they add together to result in a larger bias? If the sources of bias are in  
473 opposite directions, do they counteract each other? In other words, can the presence of non-  
474 targets compensate for the bias induced by the saccade? For this analysis, we separated saccade  
475 trials into cases where the initial fixation and the NTs were on opposite sides of the target  
476 (*Opposite side* condition, Fig 4B), or on the same side of the target (*Same side* condition, Fig  
477 4C). We conducted a 3 (NT number: 0, 1, 2)  $\times$  2 (Congruency: same side, opposite side)  $\times$  3  
478 (experiment: 1, 2, 3) mixed-design ANOVA on the saccade trials; in order to make the ANOVA  
479 feasible, we dummy-coded saccade trials with zero nontargets to be randomly assigned to the  
480 same or opposite side.

## Nontargets facilitate and bias target localization responses

481 We found a significant main effect of NT number,  $F(1.375,61.869)=24.911$ ,  $p<.001$ ,  
482  $\eta_p^2=.356$ , showing that overall the presence of nontargets biased responses towards the NT  
483 location, as before for the no-saccade trials. There was a significant main effect of congruency,  
484  $F(1,45)=49.892$ ,  $p<.001$ ,  $\eta_p^2=.526$ , and a congruency  $\times$  NT number interaction,  
485  $F(1.593,71.665)=39.222$ ,  $p<.001$ ,  $\eta_p^2=.466$ . There were also significant Experiment  $\times$  NT  
486 number and Experiment  $\times$  Congruency interactions,  $F(2.750,61.869)=5.740$ ,  $p=.002$ ,  $\eta_p^2=.203$   
487 and  $F(2,45)=7.774$ ,  $p=.001$ ,  $\eta_p^2=.257$ , respectively. The 3-way interaction between NT number,  
488 experiment and congruency was not significant,  $F(3.185,71.665)=1.970$ ,  $p=.123$ ,  $\eta_p^2=.080$ .

489 To better explore these interactions, we separated the same side and opposite side trials  
490 and did a 3 (NT number: 0, 1, 2)  $\times$  3 (experiment: 1, 2, 3) mixed-design ANOVA on each. When  
491 NTs were on the same side as the initial fixation (Fig 4C), there was a relatively stable positive  
492 response bias (i.e., toward the initial fixation); there was no significant main effect of NT number  
493 or experiment, nor NT number  $\times$  experiment interaction, all  $F$ 's  $\leq 1.905$ ,  $p$ 's  $\geq .167$ ,  $\eta_p^2$ 's  $\leq .061$ .  
494 This implies that when NTs were presented on the same side of the target as the initial fixation,  
495 there was no additivity of the biases; the magnitude of the bias on these trials was the same as the  
496 saccade-related bias alone on 0-NT trials.

497 However, when NTs were on the opposite side of the target as the initial fixation (Fig  
498 4B), we found a significant main effect of NT number,  $F(1.498,67.408)=53.383$ ,  $p<.001$ ,  
499  $\eta_p^2=.543$ , a significant main effect of experiment,  $F(2,45)=6.180$ ,  $p=.004$ ,  $\eta_p^2=.215$ , and a  
500 significant interaction,  $F(2.996,67.408)=5.495$ ,  $p=.002$ ,  $\eta_p^2=.196$ . The addition of the NTs here  
501 seemed to counteract the saccade-related bias coming from the opposite direction, with the  
502 influence of 2 NTs significantly greater than 1 NT,  $t(47)=3.027$ ,  $p=.004$ , Cohen's  $d=0.437$ .

## Nontargets facilitate and bias target localization responses

503            Interestingly, the degree to which the NTs counteracted the saccade-related bias varied by  
504 experiment. In the Baseline experiment (E1), the saccade-related bias appeared to be completely  
505 counteracted by the opposite-side NTs; the response bias when NTs were present was not  
506 significantly different from zero,  $t(15)=-0.713$ ,  $p=.487$ , Cohen's  $d=0.178$  (post-hoc t-test  
507 collapsing across 1 and 2 NTs), suggesting equal and opposite contributions from the NT-related  
508 and saccade-related biases. In the Relative experiment (E2), the NT influence seemed to exceed  
509 the saccade-related bias; here the response bias was significantly negative (towards NTs, away  
510 from initial fixation),  $t(15)=-4.312$ ,  $p=.002$ , Cohen's  $d=1.078$ , in such a way that the NT-related  
511 bias overcompensated saccade-related bias. In contrast, in the Absolute experiment (E3), the NT-  
512 related bias did not fully counteract the saccade-related bias; here the response bias was still  
513 significantly positive (towards initial fixation),  $t(15)=2.809$ ,  $p=.026$ , Cohen's  $d=-0.702$ . For these  
514 three t-tests, P values were corrected for multiple comparisons using Holm–Bonferroni  
515 correction. This pattern of results implies that the bias induced by the presence of NTs was more  
516 influential when NTs were presented in the relative reference frame than absolute reference  
517 frame across saccades.

518

## 519 **Discussion**

520            In the current study, we tested how the presence of nontargets influences target  
521 localization across saccades and during sustained fixation. Unsurprisingly, we found that target  
522 localization performance was generally worse on saccade than no-saccade trials (in terms of  
523 mean error magnitude and response variability), and the presence of nontargets improved target  
524 localization performance. The presence of nontargets exerted comparable facilitation effects on  
525 saccade trials and no-saccade trials, suggesting that the facilitation effect is a more general visual

## Nontargets facilitate and bias target localization responses

526 effect rather than of particular importance to saccadic stability. We also measured response bias  
527 (directional error), finding that participants' responses were biased towards both the initial  
528 fixation location (saccade-related bias) and the NT locations. These two sources of bias  
529 interacted in an interesting way: When both sources fell on the same side of the target they were  
530 not additive, but when they fell on opposite sides of the target, the NT bias counteracted the  
531 saccade-related bias. For both facilitation and bias effects, the influence of nontargets was  
532 stronger when there were 2 NTs than 1 NT, and was weaker in the absolute than relative and  
533 baseline experiments. Below we discuss the implications of each of these findings.

534

### 535 **Saccade influence on target localization**

536 A large literature has focused on the challenge of maintaining visual stability while  
537 moving the eyes around, particularly in terms of target localization abilities. In all three  
538 experiments, we found that saccades impaired performance by increasing error magnitude as  
539 well as response variability, even though the target was fixated within the fovea, where visual  
540 acuity and overt attention is the highest. The saccade-related increase in error magnitude and  
541 response variability happened only along the horizontal axis, such that the location errors  
542 become elongated along the saccade axis. This basic finding is intuitive, and is consistent with  
543 previous findings [10,13,24].

544 In addition to a generic saccade-related decrease in performance, we also found a  
545 systematic saccade-related bias: participants' responses were on average biased in the opposite  
546 direction of the saccade. There are three possible sources of this saccade-related bias: bias  
547 towards the screen center, bias towards the actual saccade landing position, and/or bias towards  
548 the initial fixation location. In our design, the potential effect of screen center location was



## Nontargets facilitate and bias target localization responses

549 controlled – a left/right saccade could be from center to periphery on the screen or vice versa  
550 (Fig 1) – so the screen center is not likely to be the source of this saccade-related bias. The  
551 second and third possibilities, however, could both have predicted a systematic response bias in  
552 the same direction as we found: as reported above, both the eye landing position and the mouse  
553 responses were biased towards initial fixation on average. However, the analysis differentiating  
554 the influence of saccade landing position and initial fixation location revealed that while saccade  
555 landing position did modulate the magnitude of response bias, there was still a significant bias  
556 towards the initial fixation location even on overshoot trials when the actual eye position was in  
557 the opposite direction of the target. Thus, while actual current eye position may induce some bias  
558 (similar to the influence of saccade landing site on perception of the target displacement, shown  
559 in [46]), the primary source of the saccade-related response bias here seems to be the initial  
560 fixation location. Participants may have been using the pre-saccadic fixation location as a visual  
561 or oculomotor reference, and target localization responses were biased towards this reference;  
562 however, participants were not simply clicking on the location that they looked at.

563 Our result is consistent with a number of previous studies demonstrating a response bias  
564 towards the current and/or initial fixation locations [13,36,47]. Sheth and Shimojo found that  
565 visual memory of peripheral spatial locations can be biased towards the current fixation (i.e.,  
566 “foveal bias”) over time, independent of saccade preparation or saccade execution. They  
567 proposed that this bias likely happens during encoding period when the eccentricity of the target  
568 might be underestimated [13]. A response bias towards the initial fixation location has also been  
569 found across saccades, when participants retained spatial memory of a peripheral target [36]. It  
570 should be noted that our design differed from these previous studies in that instead of a  
571 peripheral target, our target was the saccade target to be fixated on. However, we propose that

## Nontargets facilitate and bias target localization responses

572 the saccade-related bias in our result likely happened in a similar way as the studies mentioned  
573 above. When the saccade target location was presented on the screen while participants were still  
574 fixating on the initial fixation, the saccade target was indeed in the periphery at that time point.  
575 Due to the underestimated eccentricity during the encoding process, a biased representation of  
576 space was likely created and maintained across the saccade. Therefore, we still found “foveal  
577 bias” – bias towards the initial fixation, after the saccade was completed. Indeed, the magnitude  
578 of saccade-related bias we found ( $0.05^\circ$ ) is much smaller than the foveal bias in [13] (about  $1^\circ$ ),  
579 and this is likely due to the acuity difference between processing foveal and peripheral targets.

580

### 581 **Nontarget facilitation on both error magnitude and response**

#### 582 **variability**

583 The influence of nontargets on target localization has been investigated in many studies,  
584 including the presence of nontargets on saccade execution accuracy [18] and the effect of NT  
585 displacement on target displacement perception [10,19–21,24]. In our study, we focused on the  
586 influence of nontargets on target localization in a more systematic manner: investigating the  
587 number, location and reference frame of nontargets. We found that the presence of stable  
588 nontargets in general facilitated performance, by decreasing the mean error magnitude as well as  
589 response variability. The magnitude of NT facilitation was small in absolute terms (about  $0.025^\circ$   
590 or 1 pixel), but reflected an improvement of approximately 14% of the baseline for absolute error  
591 measurement, and 12% for response variability measurement. The correct target location landed  
592 in the fovea, and there were other potential references such as the display boundaries; therefore,  
593 even an improvement of 1 pixel is a meaningful benefit provided by the presence of nontargets.

## Nontargets facilitate and bias target localization responses

594 Did the NT facilitation stem from a direct effect – i.e. a more precise representation of  
595 target location – or it is possible that nontargets instead helped sustain fixation at or execute  
596 saccades to the target more accurately, which as a result could indirectly make the behavioral  
597 responses more accurate? To test this latter possibility, we analyzed the influence of nontargets  
598 on eye position accuracy (error distance between the target position and actual eye position) as  
599 well as eye position variability (RMSD of actual eye position) at the time point when the target  
600 was removed from the screen before the localization response (S2 Fig). If anything, the presence  
601 of nontargets actually increased eye position error magnitude and variability, suggesting that  
602 nontargets indeed facilitated the representation of target location.

603 Our results reflect the idea that nontargets perform as anchors or landmarks, so that the  
604 target localization could be done with them as relative references in space, consistent with  
605 previous literature (e.g., [10]; see later discussion on the effect of reference frame). Note that in  
606 our experiments, we did not explicitly instruct participants to use nontargets, which means that  
607 nontarget information might be processed and used by default, instead of only triggered by  
608 instruction. Our results showed that two nontargets facilitated slightly more than one, but the  
609 second nontarget did not double the facilitation. A possible reason is that in our design, the two  
610 nontargets always appeared inside one rectangle region: they were always on the same side of  
611 the target, and their distance to the target was similar (within  $1.5^\circ$  and  $2.5^\circ$  to the target location  
612 on the horizontal axis). Thus, the two NT objects might have been grouped together as a single  
613 landmark, or simply provided similar information, and therefore, the second nontarget might not  
614 have provided much additional reference beyond the first one. We also found that when the  
615 initial fixation location and nontargets were on the same side of the target, the presence of  
616 nontargets did not add on to the response bias (discussed below in more detail). This result

## Nontargets facilitate and bias target localization responses

617 supports a similar interpretation, that multiple sources of reference located on the same side  
618 might provide some redundant information which is relatively less useful for localization.

619

### 620 **No additional nontarget facilitation on saccade trials**

621        Though nontargets facilitated target localization on both no-saccade and saccade trials,  
622 we did not find larger magnitude of NT facilitation on saccade trials compared to no-saccade  
623 trials. This means that nontargets did not provide *additional* facilitation across a saccade  
624 compared to sustained fixation, consistent across all three experiments. In the visual stability  
625 literature, landmarks are often highlighted for their role aiding stability across saccades.  
626 However, what is often less emphasized is that these NT effects may occur independently of the  
627 saccades. Yet our study is certainly not the first to report this. Deubel and his colleagues showed  
628 that a displacement of NT objects following a blank period after the saccade might lead  
629 participants to misjudge the target location. When there was no saccade, the displacement of the  
630 nontargets after the blank had a similar effect compared to saccade trials, even though during  
631 continuous presentation participants could detect target displacement without error [24]. This  
632 result pattern was replicated in [12].

633        What does this mean for visual stability? Based on our results as well as previous studies,  
634 we propose that nontargets may be useful references during saccades, but the effect of nontargets  
635 seems to be more general; i.e., even though saccades pose particular challenges for visual  
636 stability, nontargets may not be more helpful in saccade cases than sustained fixation.

637

## 638 **Bias induced by nontarget location**

639 In addition to the nontarget facilitation effect, one of the more interesting influences of  
640 nontargets in our study was the biasing of target responses towards the nontarget locations, as  
641 well as how this bias interacts with the saccade-related response bias.

642 Response biases between fixation/saccade target and nontarget objects have been shown  
643 in previous studies, for example with perisaccadic compression of space [25,26,32] and other  
644 types of landmark-related bias [13]. The former paradigm used nontargets that briefly flashed  
645 around the time of a saccade, and the latter study tested target localization in the periphery, while  
646 our study tested stable nontargets and foveal target localization. We found a similar response  
647 bias towards nontarget location as the previous studies, although the magnitude of our nontarget  
648 bias was smaller compared with Sheth & Shimojo's result in [13]. This is again likely due to  
649 more accurate visual processing in the fovea compared to the periphery.

650 What happened on saccade trials where the saccade-related bias and NT-related bias  
651 could both take place? When the nontarget location and the initial fixation were on opposite  
652 sides of the target, the nontarget bias combined with (i.e., counteracted) the saccade-related bias.  
653 However, we found that when the nontargets and initial fixation were on the same side, the two  
654 sources of biases did not appear to combine; in fact, the response bias was not any larger than the  
655 saccade-related bias alone (i.e., saccade trials with zero nontargets).

656 This result pattern we found was partially shown in Sheth and Shimojo's study. They  
657 found that when a salient landmark was displayed on the opposite side of the fixation to the  
658 target, the response bias was reduced compared to on the same side, meaning that the landmark  
659 biased responses in the opposite direction and counteracted the foveal bias to the fixation [13].  
660 However, in their study when the landmark-related bias and fixation-induced bias were in the

## Nontargets facilitate and bias target localization responses

661 same direction, the landmark was at least  $42^\circ$  away from the target, which likely did not induce  
662 landmark-related bias at all. Our study carefully controlled the distance between nontargets and  
663 the target in same-side versus opposite-side conditions to avoid this distance confound, and we  
664 still found this discrepancy between same-side and opposite-side conditions.

665         Why did saccade-related bias and NT bias *not* add up in the same-side condition? One  
666 possible explanation is that certain mechanisms exist individually or together preventing the  
667 response from getting too far away from the memorized target location. For example, other  
668 extra-retinal mechanisms for visual stability, e.g., remapping [3,4,48], might contribute to  
669 accurate target localization, and visuomotor feedback systems [49] might also contribute to  
670 accurate localization. These mechanisms might function to maintain a maximum level of error  
671 tolerance, and as a result, they might prevent the total bias from exceeding that threshold. This  
672 possibility can also explain why nontargets located on the same side as the initial fixation still  
673 facilitated response performance by reducing response variability (as shown by the size of the  
674 ellipses in Fig 2), even while they did not further bias responses.

675         Another possibility is that the information about nontargets on the opposite side was  
676 utilized so that it counteracted saccade-related bias, but that on the same side was somehow  
677 disregarded. As discussed before, this could be because nontargets and the initial fixation  
678 location on the same side were grouped together or provided similar/redundant information. In  
679 the real world, we often have multiple nontargets which rarely appear only on the same side. We  
680 may be able to achieve accurate target localization by incorporating nontarget information from  
681 different locations, and/or by selectively utilizing nontargets in locations that can provide non-  
682 redundant information and potentially help most with localization.

683

## Nontargets facilitate and bias target localization responses

### 684 **Nontarget locations in different reference frames**

685           In Experiments 2 and 3, we presented nontargets before the saccade was triggered, and  
686 manipulated the NT locations to see whether nontargets in different reference frames would have  
687 different effects. We found that compared to the Baseline experiment, the Relative condition  
688 (same NT location relative to target) showed a similar amount of NT facilitation, while the  
689 Absolute condition (same absolute NT location on screen) showed less facilitation, in terms of  
690 both error magnitude and response variability. In addition, the nontarget bias was larger in the  
691 Relative condition; in the Relative condition, the nontarget bias overcompensated for the  
692 saccade-related bias when they were on opposite sides of the target, while in the Absolute  
693 condition, the NT bias did not even fully counteract the saccade bias. In general, for both  
694 facilitation and bias effects, the reference frame did not change the overall pattern of the results,  
695 but rather modulated the pattern seen in the Baseline condition. One interpretation aligned with  
696 previous literature is that the critical information for target localization across saccades was  
697 already present in the baseline condition: i.e., the relative spatial information between the  
698 saccade target and nontargets, at the time right after the saccade target was presented [10,33]. In  
699 the Relative condition, this relative spatial information was also preserved across saccades, likely  
700 enhancing the influence of the nontargets, whereas in the Absolute condition, this relative spatial  
701 information was not maintained, possibly reducing the influence of the nontargets.

702           The importance of relative spatial information that we found is consistent with Deubel's  
703 finding on the effect of nontarget/landmark displacement [10]. In their study, a displacement of  
704 the landmarks broke the relative spatial information between landmarks and the target. Under the  
705 assumption that the landmarks are typically stable and unchanged, participants therefore tended  
706 to report the target to be displaced in the opposite direction. Our results provide converging

## Nontargets facilitate and bias target localization responses

707 evidence that the relative spatial information between nontargets and the target is important, not  
708 only to decide whether the target was displaced or not, but also to recall the specific target  
709 location. While it may seem somewhat counterintuitive that landmarks are more influential when  
710 they move with the eyes to preserve relative position, rather than remain stable in environmental  
711 or absolute coordinates, this idea is also consistent with a related retinotopic benefit  
712 phenomenon, such as spatial attention lingering in retinotopic coordinates after a saccade [35],  
713 and more precise memory for retinotopic than spatiotopic locations [36,47]. Note that in our  
714 study, the peripheral nontargets in the “relative” condition were not strictly retinotopic, since  
715 they moved with the saccade target cue rather than the actual eye position. Thus, during the  
716 saccade, the retinotopic locations of the NTs were constantly changing, but the critical *relative*  
717 spatial location between the target and NTs was maintained.

718         It should be noted that there was a confound in the Absolute experiment that could  
719 potentially lead to a weaker NT effect than the other two experiments. As described above, we  
720 attempted to control the distance between the nontargets and the target when the initial fixation  
721 location and NT location were on the same side versus opposite sides. However, the only way  
722 this was possible in the Absolute condition was to vary the initial nontarget-target distance,  
723 resulting in an overall greater average distance for Absolute trials. Previous studies have  
724 demonstrated that larger distances between nontargets and the target could reduce the influence  
725 of nontargets on target localization [10]. Thus, it is possible that the larger average distance in  
726 Absolute experiment contributed to the weaker effects. However, even when we looked at trials  
727 in which the NT-target distance was restricted to the equivalent “near-near” cases only, there was  
728 still greater facilitation for Relative than Absolute conditions, a result indicating an effect of  
729 reference frame on top of the distance effect. Moreover, it is worth emphasizing that the



## Nontargets facilitate and bias target localization responses

730 existence of a distance effect itself is another example of the importance of *relative* distance to  
731 the target.

732

### 733 **Landmarks or distractors?**

734 As discussed above, our results showed that the presence of nontargets both decreased  
735 response variability and induced response bias. Did the presence of nontargets actually help with  
736 or hurt target localization? In our study, overall nontargets facilitated performance; on average  
737 the responses were closer to the correct location when nontargets were presented, suggesting that  
738 the nontargets served as helpful landmarks. But it is also possible that the nontargets acted as  
739 distractors, because the responses were biased with smaller variability, as if participants  
740 responded more consistently at a wrong location. A related open question is whether subjects  
741 were consciously using the nontargets as landmarks to have a more accurate location in mind,  
742 and further, whether the presence of nontargets influenced where participants were perceiving  
743 the target to be (perceptual bias), and/or where they were clicking the mouse during the decision  
744 phase (response bias).

745 Future studies may investigate more into the above two interpretations, to further our  
746 understanding of the internal representation of target location. In addition, future work may  
747 manipulate the physical properties (e.g., similarity, salience, location, validity) of multiple  
748 independent nontargets, to explore how various types of NT information can be incorporated in  
749 different real-world scenarios.

750

## 751 **Conclusion**

752           In summary, our experiments showed that the presence of nontargets influenced target  
753 localization. This influence seemed to manifest as a general effect on target localization rather  
754 than something specific to saccade-related processing. We argue that during a localization task –  
755 with or without saccade – the spatial location of the target is memorized along with the relative  
756 spatial information between the target and nontargets. This information may be stored in memory  
757 to reduce response variability, but the information can be distorted such that it induces a response  
758 bias at the same time. If the target localization is done across a saccade, the saccade trajectory  
759 (initial fixation location and current eye position) might also be stored as spatial references to  
760 potentially benefit and/or bias responses, and pre-saccadic and post-saccadic memories are likely  
761 incorporated together. Our representation of the target location is thus influenced by a  
762 combination of these factors – perhaps weighed by the most non-redundant information – to  
763 produce behavioral responses.

764

## 765 **Acknowledgement**

766           The authors thank Emma Wu Dowd for inspiring discussion during writing.

767

## 768 **References**

- 769 1. Duhamel J-R, Colby CL, Goldberg ME. The Updating of the Representation of Visual  
770 Space in Parietal Cortex by Intended Eye Movements. *Science* [Internet] 1992 [cited 2017  
771 Jan 5];255:90. Available from:  
772 <http://search.proquest.com/docview/213538964/abstract/65128B40F0E64B92PQ/1>
- 773 2. Sommer MA, Wurtz RH. Influence of the thalamus on spatial visual processing in frontal  
774 cortex. *Nature* [Internet] 2006 [cited 2017 Mar 9];444:374–7. Available from:  
775 <http://www.nature.com/nature/journal/v444/n7117/abs/nature05279.html>

## Nontargets facilitate and bias target localization responses

- 776 3. Cavanagh P, Hunt AR, Afraz A, Rolfs M. Visual stability based on remapping of attention  
777 pointers. *Trends Cogn. Sci.* [Internet] 2010 [cited 2017 Mar 14];14:147–53. Available  
778 from: <http://www.sciencedirect.com/science/article/pii/S1364661310000288>
- 779 4. Marino AC, Mazer JA. Perisaccadic Updating of Visual Representations and Attentional  
780 States: Linking Behavior and Neurophysiology. *Front. Syst. Neurosci.* [Internet] 2016  
781 [cited 2016 Jun 11];10. Available from:  
782 <http://www.ncbi.nlm.nih.gov/pmc/articles/PMC4743436/>
- 783 5. Wurtz RH. Neuronal mechanisms of visual stability. *Vision Res.* [Internet] 2008 [cited  
784 2017 Mar 9];48:2070–89. Available from:  
785 <http://www.sciencedirect.com/science/article/pii/S0042698908001727>
- 786 6. Currie CB, McConkie GW, Carlson-Radvansky LA, Irwin DE. The role of the saccade  
787 target object in the perception of a visually stable world. *Percept. Psychophys.* [Internet]  
788 2000 [cited 2014 Aug 29];62:673–83. Available from:  
789 <http://link.springer.com/article/10.3758/BF03206914>
- 790 7. Deubel H, Schneider WX, Bridgeman B. Postsaccadic target blanking prevents saccadic  
791 suppression of image displacement. *Vision Res.* [Internet] 1996 [cited 2016 Feb  
792 11];36:985–96. Available from:  
793 <http://www.sciencedirect.com/science/article/pii/0042698995002030>
- 794 8. Tas AC, Moore CM, Hollingworth A. An object-mediated updating account of insensitivity  
795 to transsaccadic change. *J. Vis.* [Internet] 2012 [cited 2018 Jun 1];12:18–18. Available  
796 from: <http://jov.arvojournals.org/article.aspx?articleid=2192028>
- 797 9. Honda H. Modification of saccade-contingent visual mislocalization by the presence of a  
798 visual frame of reference. *Vision Res.* [Internet] 1999 [cited 2014 Sep 10];39:51–7.  
799 Available from: <http://www.sciencedirect.com/science/article/pii/S0042698998001345>
- 800 10. Deubel H. Localization of targets across saccades: Role of landmark objects. *Vis. Cogn.*  
801 [Internet] 2004 [cited 2017 Jan 31];11:173–202. Available from:  
802 <http://dx.doi.org/10.1080/13506280344000284>
- 803 11. Deubel H, Bridgeman B, Schneider WX. Immediate post-saccadic information mediates  
804 space constancy. *Vision Res.* [Internet] 1998 [cited 2014 Sep 10];38:3147–59. Available  
805 from: <http://www.sciencedirect.com/science/article/pii/S0042698998000480>
- 806 12. Higgins JS, Wang RF. A landmark effect in the perceived displacement of objects. *Vision*  
807 *Res.* [Internet] 2010 [cited 2018 Jan 23];50:242–8. Available from:  
808 <http://www.sciencedirect.com/science/article/pii/S0042698909005173>
- 809 13. Sheth BR, Shimojo S. Compression of space in visual memory. *Vision Res.* [Internet] 2001  
810 [cited 2017 Jan 31];41:329–41. Available from:  
811 <https://www.sciencedirect.com/science/article/pii/S0042698900002303>

## Nontargets facilitate and bias target localization responses

- 812 14. Maguire EA, Burgess N, O’Keefe J. Human spatial navigation: cognitive maps, sexual  
813 dimorphism, and neural substrates. *Curr. Opin. Neurobiol.* [Internet] 1999 [cited 2018 Jan  
814 23];9:171–7. Available from:  
815 <http://www.sciencedirect.com/science/article/pii/S0959438899800233>
- 816 15. Barras C, Kerzel D. Target-nontarget similarity decreases search efficiency and increases  
817 stimulus-driven control in visual search. *Atten. Percept. Psychophys.* [Internet] 2017 [cited  
818 2018 Apr 10];79:2037–43. Available from:  
819 <https://link.springer.com/article/10.3758/s13414-017-1367-9>
- 820 16. Theeuwes J. Perceptual selectivity for color and form. *Percept. Psychophys.* [Internet] 1992  
821 [cited 2016 Jan 31];51:599–606. Available from:  
822 <http://link.springer.com/article/10.3758/BF03211656>
- 823 17. Dassonville P, Schlag J, Schlag-Rey M. The use of egocentric and exocentric location cues  
824 in saccadic programming. *Vision Res.* [Internet] 1995 [cited 2014 Sep 10];35:2191–9.  
825 Available from: <http://www.sciencedirect.com/science/article/pii/0042698994003173>
- 826 18. Karn KS, Møller P, Hayhoe MM. Reference frames in saccadic targeting. *Exp. Brain Res.*  
827 [Internet] 1997 [cited 2017 Aug 4];115:267–82. Available from:  
828 <https://link.springer.com/article/10.1007/PL00005696>
- 829 19. Legge GE, Campbell FW. Displacement detection in human vision. *Vision Res.* [Internet]  
830 1981 [cited 2018 Feb 20];21:205–13. Available from:  
831 <http://www.sciencedirect.com/science/article/pii/0042698981901140>
- 832 20. Verfaillie K. Transsaccadic Memory for the Egocentric and Allocentric Position of a  
833 Biological-motion Walker. *J. Exp. Psychol. Learn. Mem. Cogn.* [Internet] 1997 [cited 2018  
834 Feb 20];23:739–60. Available from: [https://insights.ovid.com/experimental-psychology-  
835 learning-memory-cognition/jeplm/1997/05/000/transsaccadic-memory-egocentric-  
836 allocentric/12/00004786](https://insights.ovid.com/experimental-psychology-learning-memory-cognition/jeplm/1997/05/000/transsaccadic-memory-egocentric-allocentric/12/00004786)
- 837 21. Germeys F, Graef P de, Panis S, Eccelpoel C van, Verfaillie K. Transsaccadic integration of  
838 bystander locations. *Vis. Cogn.* [Internet] 2004 [cited 2018 Feb 20];11:203–34. Available  
839 from: <https://doi.org/10.1080/13506280344000301>
- 840 22. Gysen V, Verfaillie K, De Graef P. Transsaccadic perception of translating objects: effects  
841 of landmark objects and visual field position. *Vision Res.* [Internet] 2002 [cited 2017 Dec  
842 18];42:1785–96. Available from:  
843 <http://www.sciencedirect.com/science/article/pii/S0042698902001050>
- 844 23. Carlson-Radvansky LA. Memory for relational information across eye movements. *Percept.*  
845 *Psychophys.* [Internet] 1999 [cited 2014 Sep 10];61:919–34. Available from:  
846 <http://link.springer.com/article/10.3758/BF03206906>
- 847 24. Deubel H, Koch C, Bridgeman B. Landmarks facilitate visual space constancy across  
848 saccades and during fixation. *Vision Res.* [Internet] 2010 [cited 2014 Aug 29];50:249–59.  
849 Available from: <http://www.sciencedirect.com/science/article/pii/S0042698909004386>

## Nontargets facilitate and bias target localization responses

- 850 25. Ross J, Morrone MC, Burr DC. Compression of visual space before saccades. *Nature*  
851 1997;386:598–601.
- 852 26. Awater H, Lappe M. Mislocalization of Perceived Saccade Target Position Induced by  
853 Perisaccadic Visual Stimulation. *J. Neurosci.* [Internet] 2006 [cited 2017 Jul 26];26:12–20.  
854 Available from: <http://www.jneurosci.org/content/26/1/12>
- 855 27. Hamker FH, Zirnsak M, Calow D, Lappe M. The Peri-Saccadic Perception of Objects and  
856 Space. *PLOS Comput Biol* [Internet] 2008 [cited 2016 Jun 1];4:e31. Available from:  
857 <http://journals.plos.org/ploscompbiol/article?id=10.1371/journal.pcbi.0040031>
- 858 28. Zirnsak M, Moore T. Saccades and shifting receptive fields: anticipating consequences or  
859 selecting targets? *Trends Cogn. Sci.* [Internet] 2014 [cited 2017 Feb 20];18:621–8.  
860 Available from: <http://www.sciencedirect.com/science/article/pii/S1364661314002137>
- 861 29. Zirnsak M, Steinmetz NA, Noudoost B, Xu KZ, Moore T. Visual space is compressed in  
862 prefrontal cortex before eye movements. *Nature* [Internet] 2014 [cited 2017 Mar  
863 10];507:504–7. Available from:  
864 <http://www.nature.com/nature/journal/v507/n7493/abs/nature13149.html>
- 865 30. Born S, Zimmermann E, Cavanagh P. The spatial profile of mask-induced compression for  
866 perception and action. *Vision Res.* [Internet] 2015 [cited 2018 Jun 1];110:128–41.  
867 Available from: <http://www.sciencedirect.com/science/article/pii/S0042698915000711>
- 868 31. Bekkering H, Neggers SFW. Visual Search Is Modulated by Action Intentions. *Psychol.*  
869 *Sci.* [Internet] 2002 [cited 2018 Mar 12];13:370–4. Available from:  
870 <https://doi.org/10.1111/j.0956-7976.2002.00466.x>
- 871 32. Ross J, Morrone MC, Goldberg ME, Burr DC. Changes in visual perception at the time of  
872 saccades. *Trends Neurosci.* [Internet] 2001 [cited 2016 Feb 18];24:113–21. Available from:  
873 <http://www.sciencedirect.com/science/article/pii/S0166223600016854>
- 874 33. Bays PM, Husain M. Spatial remapping of the visual world across saccades. *Neuroreport*  
875 [Internet] 2007 [cited 2018 Feb 21];18:1207–13. Available from:  
876 <https://www.ncbi.nlm.nih.gov/pmc/articles/PMC2531238/>
- 877 34. Golomb JD. Robustness of the retinotopic attentional trace after eye movements. *J. Vis.*  
878 [Internet] 2010 [cited 2015 Jul 10];10:1–12. Available from:  
879 <http://jov.arvojournals.org/Article.aspx?doi=10.1167/10.3.19>
- 880 35. Golomb JD, Chun MM, Mazer JA. The Native Coordinate System of Spatial Attention Is  
881 Retinotopic. *J. Neurosci.* [Internet] 2008 [cited 2015 Jul 17];28:10654–62. Available from:  
882 <http://www.jneurosci.org/content/28/42/10654>
- 883 36. Golomb JD, Kanwisher N. Retinotopic memory is more precise than spatiotopic memory.  
884 *Proc. Natl. Acad. Sci.* [Internet] 2012 [cited 2015 Jul 19];109:1796–801. Available from:  
885 <http://www.pnas.org/content/109/5/1796>

## Nontargets facilitate and bias target localization responses

- 886 37. Irwin DE. Information integration across saccadic eye movements. *Cognit. Psychol.*  
887 [Internet] 1991;23:420–56. Available from:  
888 <http://www.sciencedirect.com/science/article/pii/001002859190015G>
- 889 38. Lisi M, Cavanagh P, Zorzi M. Spatial constancy of attention across eye movements is  
890 mediated by the presence of visual objects. *Atten. Percept. Psychophys.* [Internet] 2015  
891 [cited 2015 Apr 8];1–11. Available from: <http://link.springer.com/article/10.3758/s13414-015-0861-1>  
892
- 893 39. Fabius JH, Fracasso A, Stigchel SV der. Spatiotopic updating facilitates perception  
894 immediately after saccades. *Sci. Rep.* [Internet] 2016 [cited 2018 Feb 1];6:34488. Available  
895 from: <https://www.nature.com/articles/srep34488>
- 896 40. Melcher D, Morrone MC. Spatiotopic temporal integration of visual motion across saccadic  
897 eye movements. *Nat. Neurosci.* [Internet] 2003 [cited 2014 Sep 30];6:877–81. Available  
898 from: <http://www.nature.com/neuro/journal/v6/n8/abs/nn1098.html>
- 899 41. Melcher D, Morrone MC. Nonretinotopic visual processing in the brain. *Vis. Neurosci.*  
900 [Internet] 2015 [cited 2018 Feb 1];32. Available from:  
901 [https://www.cambridge.org/core/journals/visual-neuroscience/article/nonretinotopic-visual-  
902 processing-in-the-brain/10DDD237ECAAD7B5A2BBB258C9123769](https://www.cambridge.org/core/journals/visual-neuroscience/article/nonretinotopic-visual-processing-in-the-brain/10DDD237ECAAD7B5A2BBB258C9123769)
- 903 42. Brainard DH. The Psychophysics Toolbox. *Spat. Vis.* 1997;10:433–6.
- 904 43. Van Opstal AJ, Van Gisbergen JAM. Skewness of saccadic velocity profiles: A unifying  
905 parameter for normal and slow saccades. *Vision Res.* [Internet] 1987 [cited 2015 Apr  
906 8];27:731–45. Available from:  
907 <http://www.sciencedirect.com/science/article/pii/004269898790071X>
- 908 44. JASP Team. JASP (Version 0.8.2) [Computer software] [Internet]. 2017. Available from:  
909 <https://jasp-stats.org/>
- 910 45. Spruyt V. How to draw an error ellipse representing the covariance matrix? [Internet].  
911 *Comput. Vis. Dummies2014* [cited 2018 Feb 26]; Available from:  
912 <http://www.visiondummy.com/2014/04/draw-error-ellipse-representing-covariance-matrix/>
- 913 46. Collins T, Rolfs M, Deubel H, Cavanagh P. Post-saccadic location judgments reveal  
914 remapping of saccade targets to non-foveal locations. *J. Vis.* [Internet] 2009 [cited 2018  
915 Feb 21];9:29–29. Available from: <http://jov.arvojournals.org/article.aspx?articleid=2122590>
- 916 47. Shafer-Skelton A, Golomb JD. Memory for retinotopic locations is more accurate than  
917 memory for spatiotopic locations, even for visually guided reaching. *Psychon. Bull. Rev.*  
918 [Internet] 2017 [cited 2017 Dec 4];1–11. Available from:  
919 <https://link.springer.com/article/10.3758/s13423-017-1401-x>
- 920 48. Melcher D. Visual stability. *Philos. Trans. R. Soc. B Biol. Sci.* [Internet] 2011 [cited 2014  
921 Sep 11];366:468–75. Available from:  
922 <http://rspb.royalsocietypublishing.org/content/366/1564/468>



## Nontargets facilitate and bias target localization responses

923 49. Grafton ST, Schmitt P, Van Horn J, Diedrichsen J. Neural substrates of visuomotor learning  
924 based on improved feedback control and prediction. *NeuroImage* [Internet] 2008 [cited  
925 2016 Jun 14];39:1383–95. Available from:  
926 <http://www.sciencedirect.com/science/article/pii/S1053811907009056>

927

## 928 **Supporting information**

929 *S1 Fig. Influence of saccade landing position on (saccade-related) response bias. A) Saccade landing*  
930 *position. Data are shown for saccade trials with 0 nontargets. Positive values indicate saccade landing*  
931 *positions biased towards the initial fixation location (i.e., undershoot). There was a significant saccade*  
932 *undershoot on average when there was zero NT,  $t(47)=11.33, p<.001$ , Cohen's  $d=1.635$ . B) Saccade-*  
933 *related response bias. Here bias (directional errors) is shown for no-saccade and saccade trials with 0*  
934 *nontargets. Positive values indicate a response bias towards the initial fixation location on saccade trials,*  
935 *and towards right on no-saccade trials. Data here are replotted from main test Figure 4, 0-NT. C)*  
936 *Saccade-related response bias in undershoot trials and overshoot trials. The saccade trials in (B) were*  
937 *separated into undershoot trials and overshoot trials based on saccade landing position. Again, positive*  
938 *values indicate a response bias towards the initial fixation location, and this bias was found in both*  
939 *undershot and overshoot trials, with only a difference in the magnitude of the bias. The schematic above*  
940 *shows the scenarios indicated by the results. Arrows show the direction of saccades; eye symbols indicate*  
941 *the saccade landing positions; red crosses indicate the correct target locations; black crosses show the*  
942 *actual response locations. This part of data was submitted to 2 (saccade landing position: undershoot,*  
943 *overshoot)  $\times$  3 (experiment: 1, 2, 3) mixed-design ANOVA. There was a significant main effect of saccade*  
944 *landing position,  $F(1,45)=9.102, p=.004, \eta_p^2=.168$ , but no interaction between saccade landing position*  
945 *and experiment,  $F(2,45)=0.035, p=.965, \eta_p^2=.002$ . The response bias was indeed smaller on overshoot*  
946 *trials compared to undershoot trials, but it was still significantly greater than zero in each experiment,*  
947  *$t's \geq 2.802, p's \leq .013$ , Cohen's  $d's \geq 0.700$  ( $p$  values corrected for multiple comparisons).  $N=16$  for each*  
948 *experiment. Error bars are SEM.*

## Nontargets facilitate and bias target localization responses

949

950 **S2 Fig. Influence of nontarget number on eye position.** A) Eye position error magnitude defined as the  
951 distance between the final eye position just before response period and the correct fixation/saccade target  
952 location, incorporating error on both horizontal and vertical axes. Compare to main text Figure 3A  
953 (influence of nontarget number on manual target localization response accuracy). Whereas nontargets  
954 decreased manual target localization error (improving performance), the same pattern was not found for  
955 eye position (oculomotor) accuracy. A 2 (saccade presence: 0, 1)  $\times$  3 (NT number: 0, 1, 2)  $\times$  3  
956 (experiment: 1, 2, 3) mixed-design ANOVA found a significant main effect of NT number, that the  
957 presence of NT(s) actually increased eye position error,  $F(2,90)=11.892$ ,  $p<.001$ ,  $\eta_p^2=.209$ . B) Similar to  
958 A) but on eye position variability, calculated using RMSD. Compared to main text Figure 3B where  
959 nontargets decreased manual response variability, nontargets significantly increased eye position  
960 variability,  $F(1.357,61.077)=3.690$ ,  $p=.047$ ,  $\eta_p^2=.076$ .  $N=16$  for each experiment. Error bars are SEM.

961

962 **S3 Fig. Different distance conditions in Absolute experiment compared to Baseline and Relative**  
963 **experiments.** A) Schematic showing same-side and opposite-side conditions for Relative and Absolute  
964 experiments (example here shows rightward saccades). Black cross and black circles indicate initial  
965 fixation location and initial NT positions; white cross and solid circles indicate final fixation location and  
966 final NT positions. B) Descriptive scatter plots show the response distribution and the 95% confidence  
967 ellipse, as in main text Figure 2, but here plotted separate for each distance condition in Absolute  
968 experiment. Data are collapsed across participants for visualization;  $N=16$  for each experiment.

969

970 **S4 Fig. Influence of different distance conditions on response error magnitude and variability,**  
971 **separating the same- and opposite-side conditions.** A) Error magnitude comparisons between three  
972 distance conditions in Absolute experiment, as well as conditions in the Baseline and Relative  
973 experiments. Left figure shows opposite-side conditions, and right figure shows same-side conditions. As  
974 in the main text, we calculated “NT facilitation” as the difference in response error magnitude for 1 and



## Nontargets facilitate and bias target localization responses

975 2 NTs compared to the zero NT trials in the same experiment/condition. For the Absolute same-side  
976 conditions, a 2 (distance: near-far, near-near)  $\times$  2 (NT number: 1, 2) mixed-design ANOVA on these  
977 facilitation scores reported no significant main effects of distance or NT number, nor interaction,  
978  $F$ 's  $\leq 2.069$ ,  $p$ 's  $\geq .171$ ,  $\eta_p^2$ 's  $\leq 0.121$ . There was also no significant difference between absolute-same near-  
979 near and relative-same (also near-near),  $F(1,15)=2.621$ ,  $p=.126$ ,  $\eta_p^2=.149$ . B) Similar analyses to A) but  
980 for response variability. Here there was a significant main effect of distance,  $F(1,15)=5.432$ ,  $p=.034$ ,  
981  $\eta_p^2=.266$ , with stronger facilitation for Abs-same near-near than Abs-same near-far. There was also a  
982 significant difference between Abs-same near-near and relative-same (near-near),  $F(1,15)=10.978$ ,  
983  $p=.005$ ,  $\eta_p^2=.423$ , revealing an effect of reference frame on top of the distance effect.  $N=16$  for each  
984 experiment. Error bars are SEM.

**A**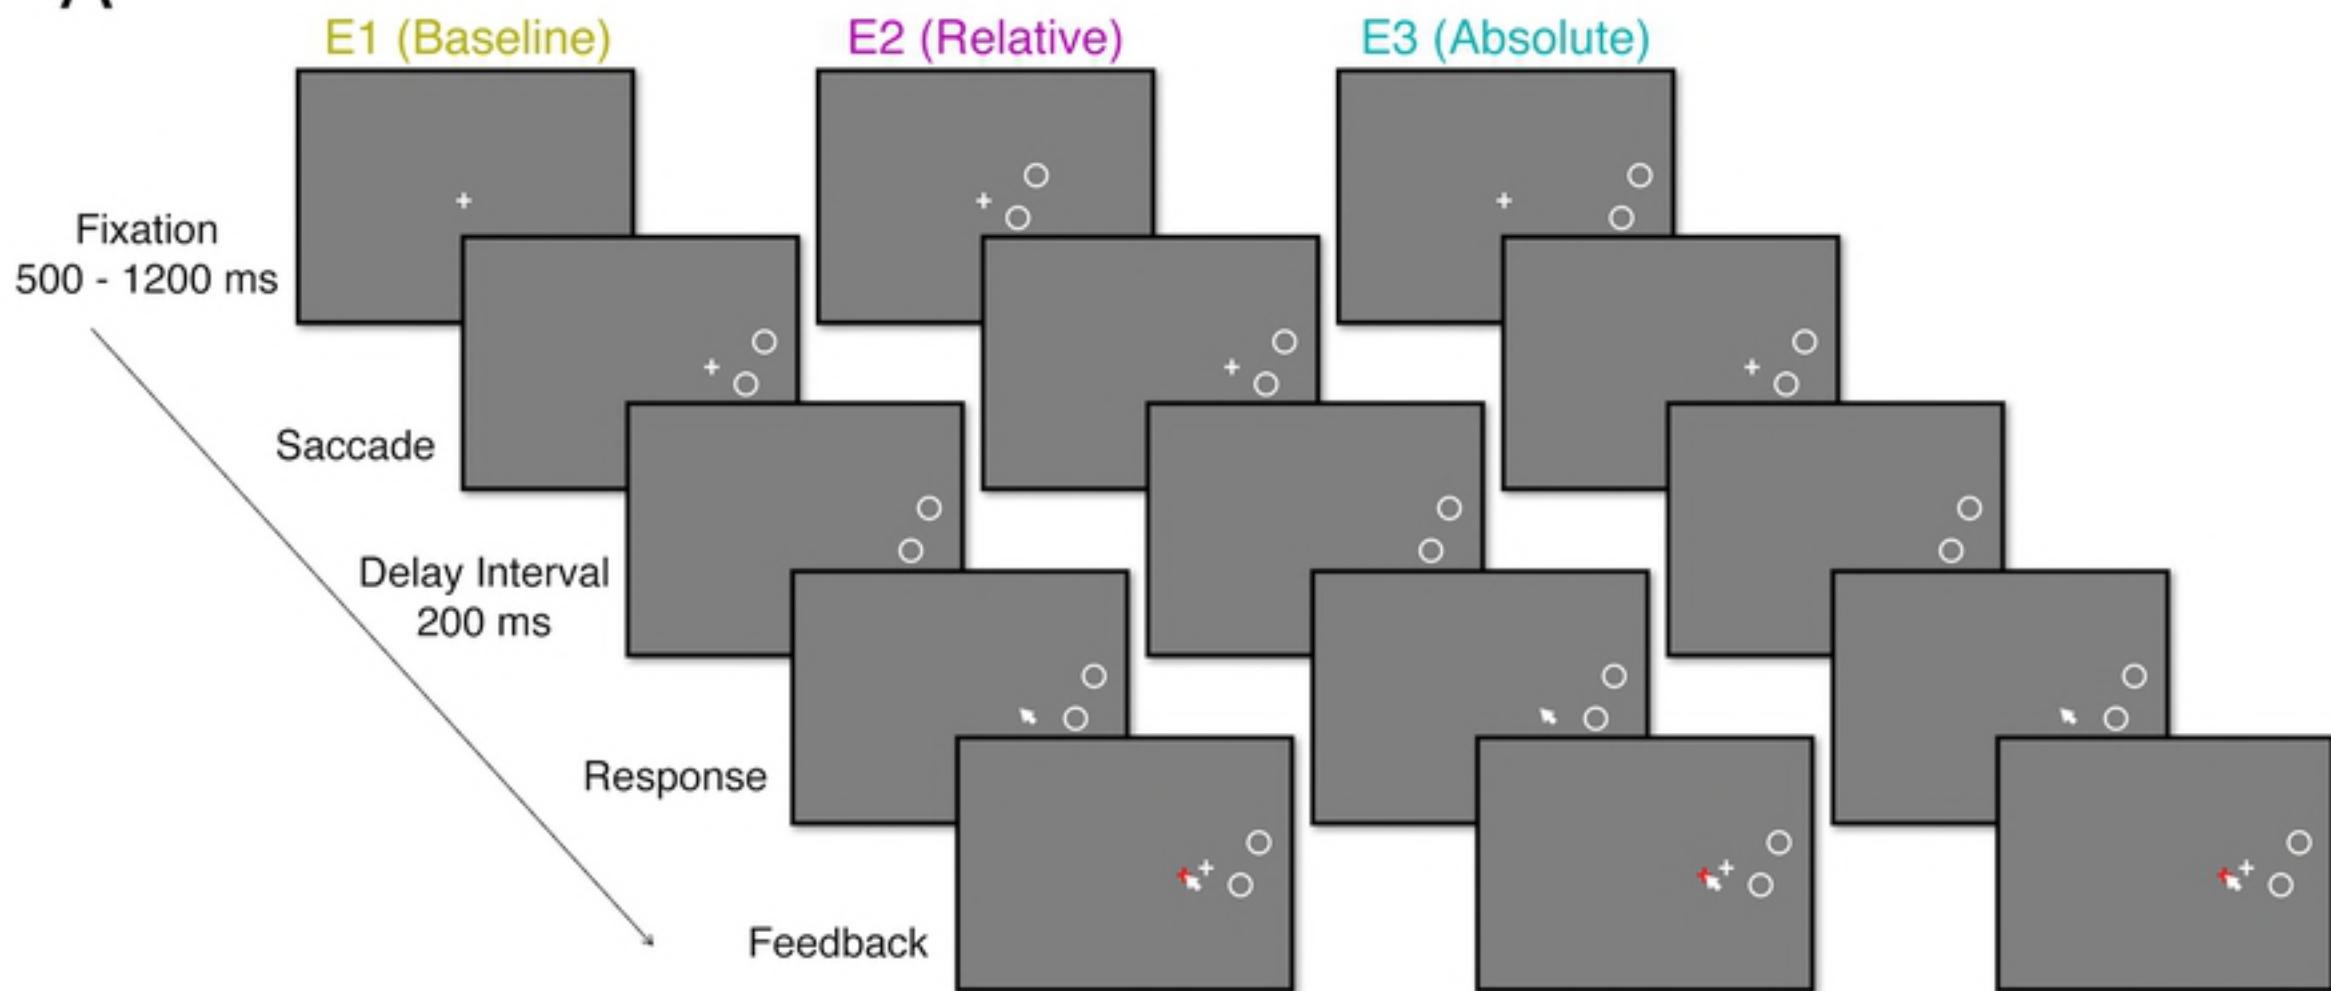**B**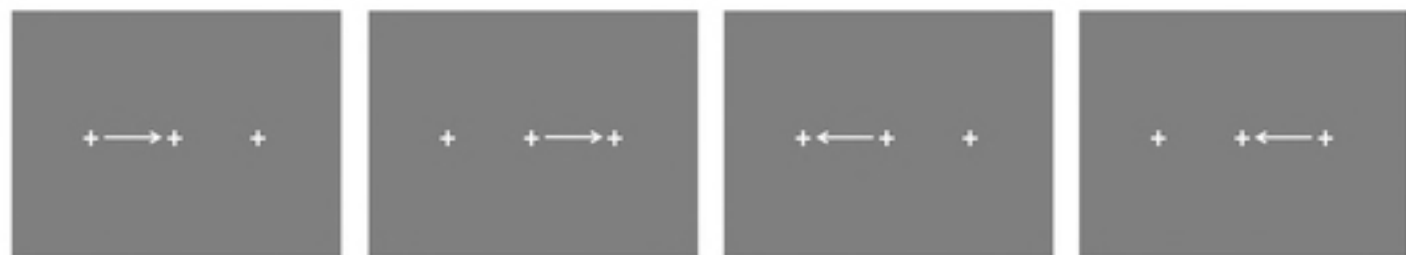**C**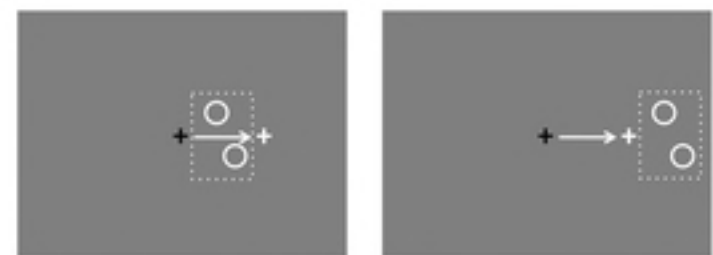

E1 (Baseline)

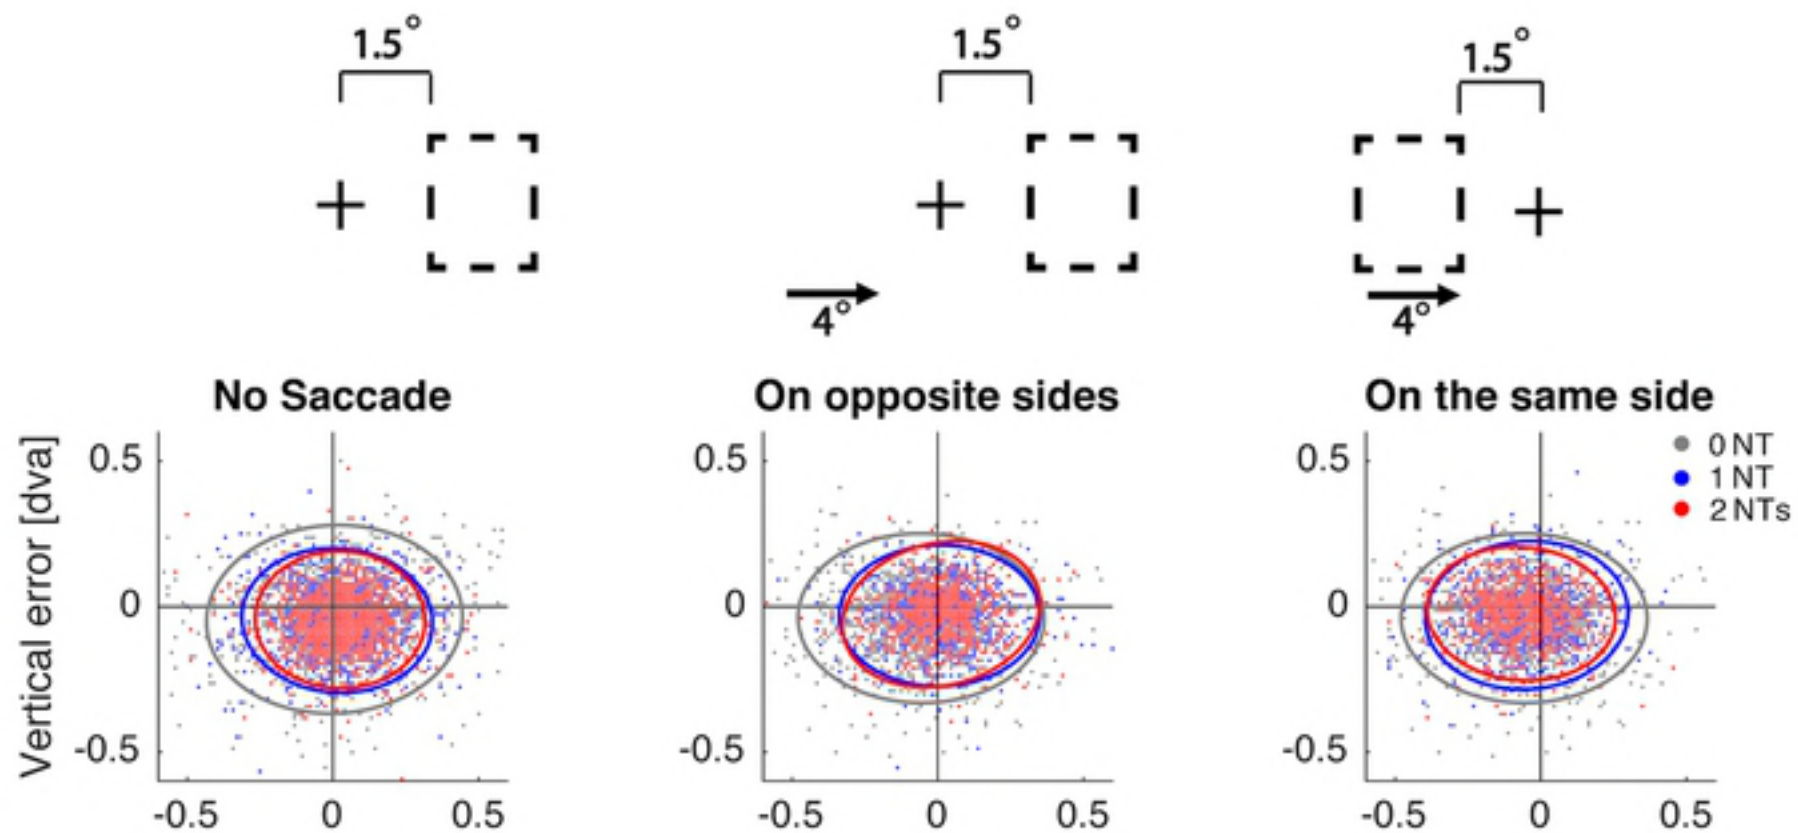

E2 (Relative)

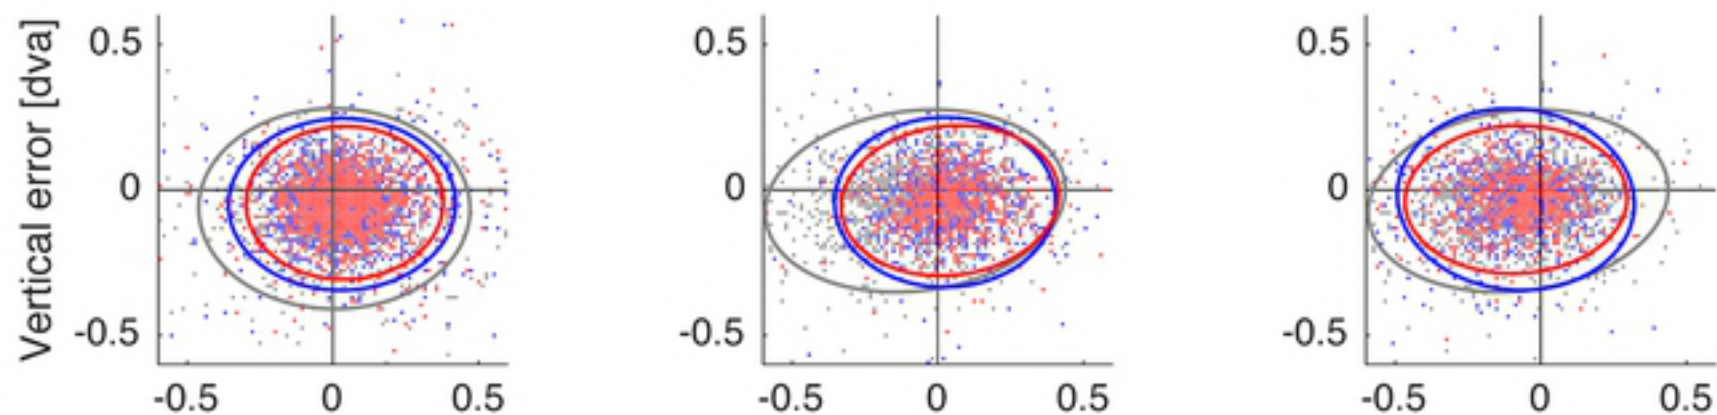

E3 (Absolute)

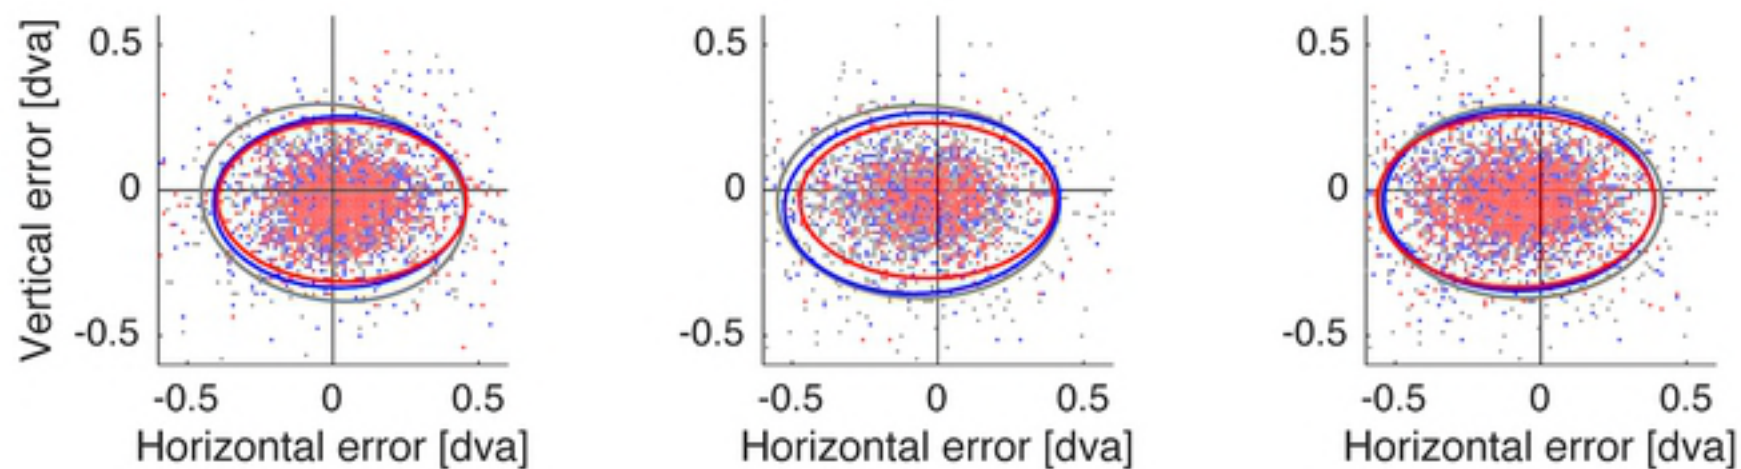

**A**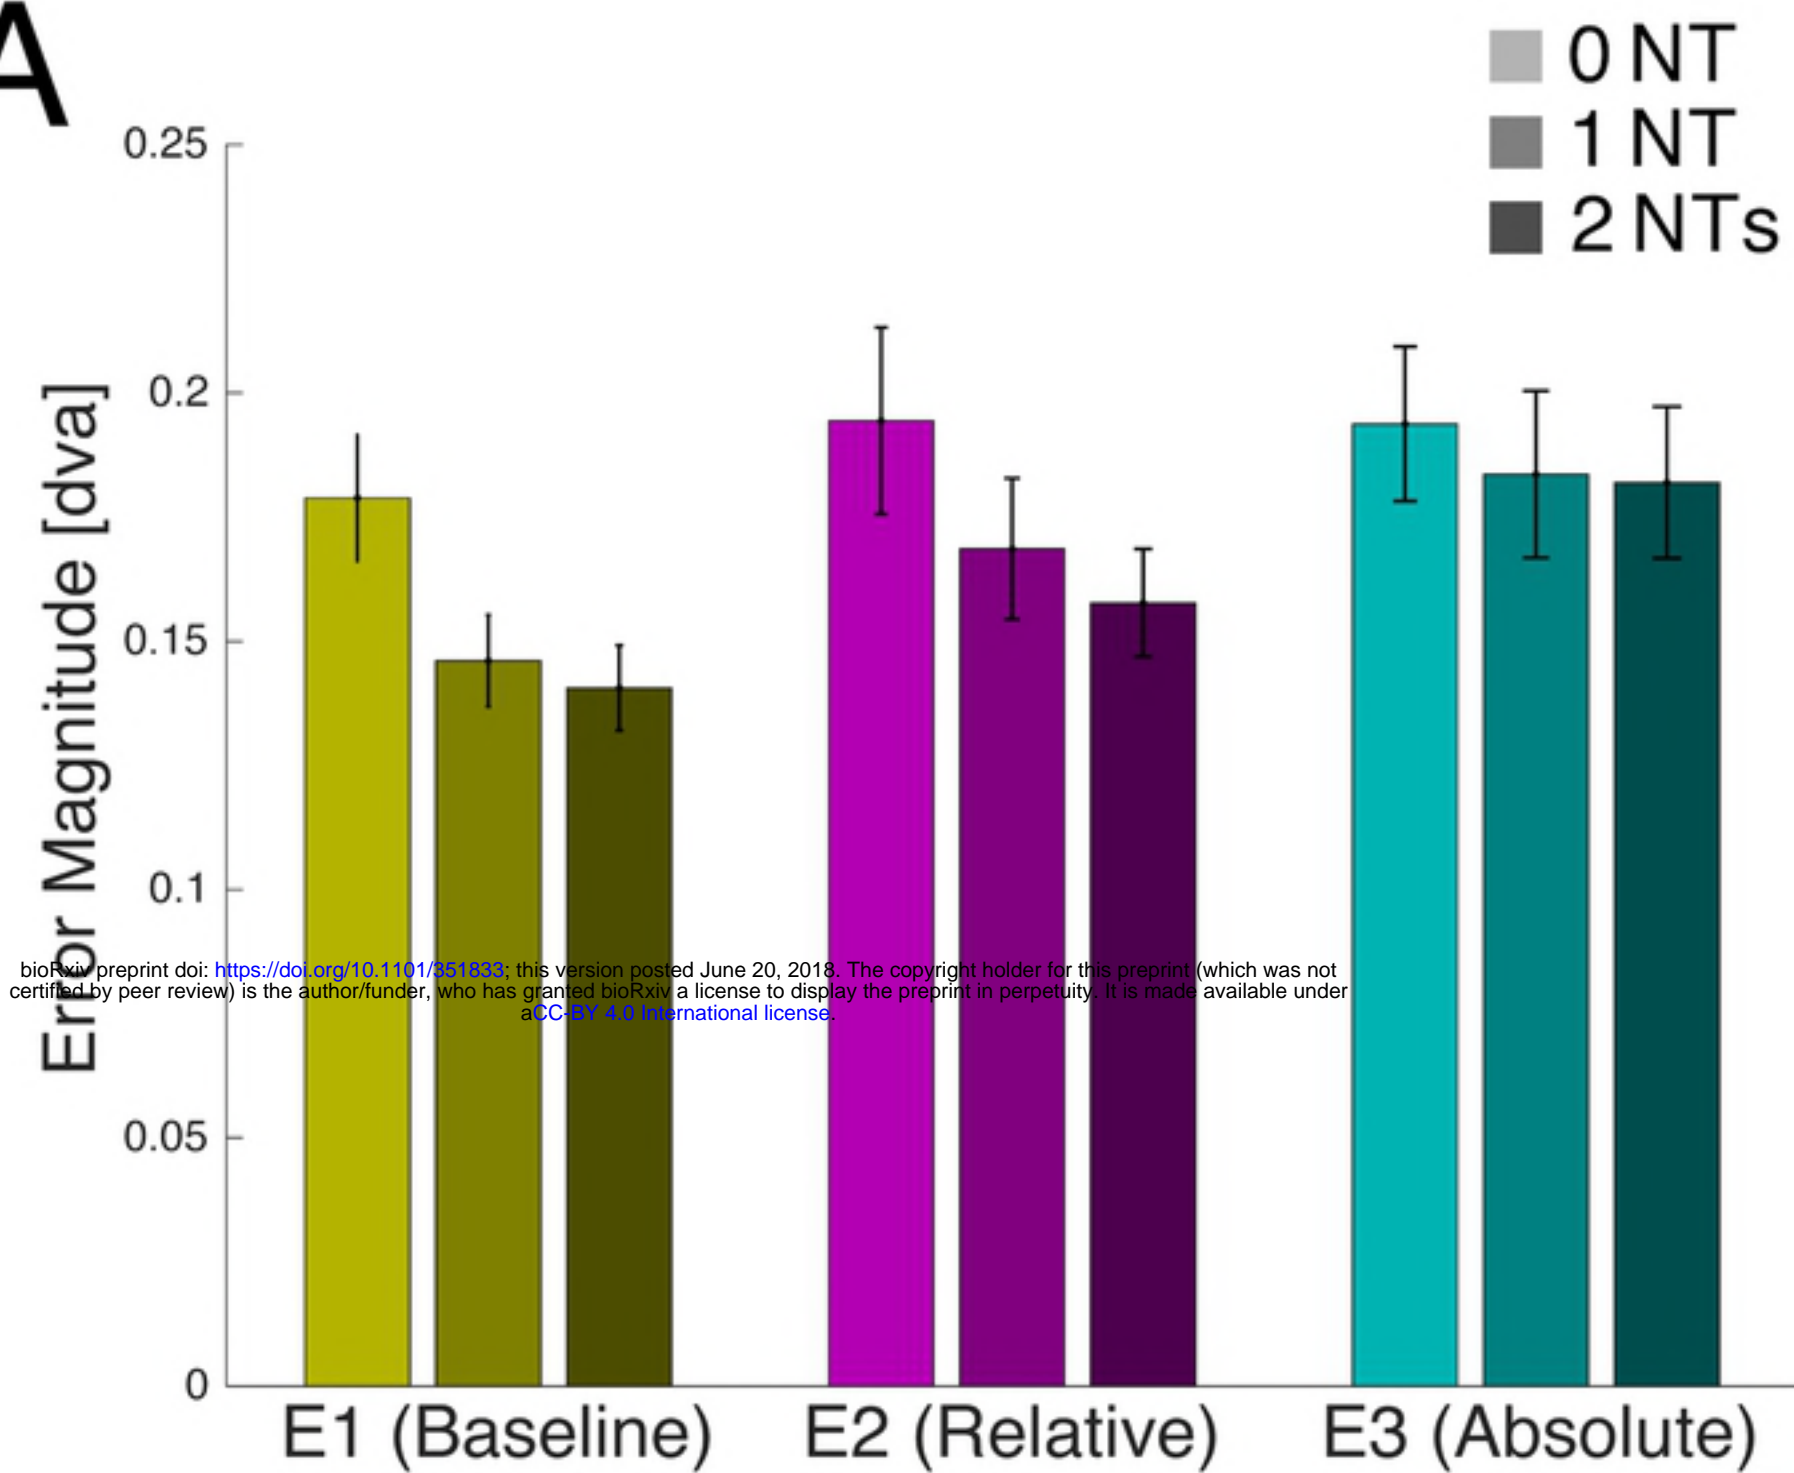**B**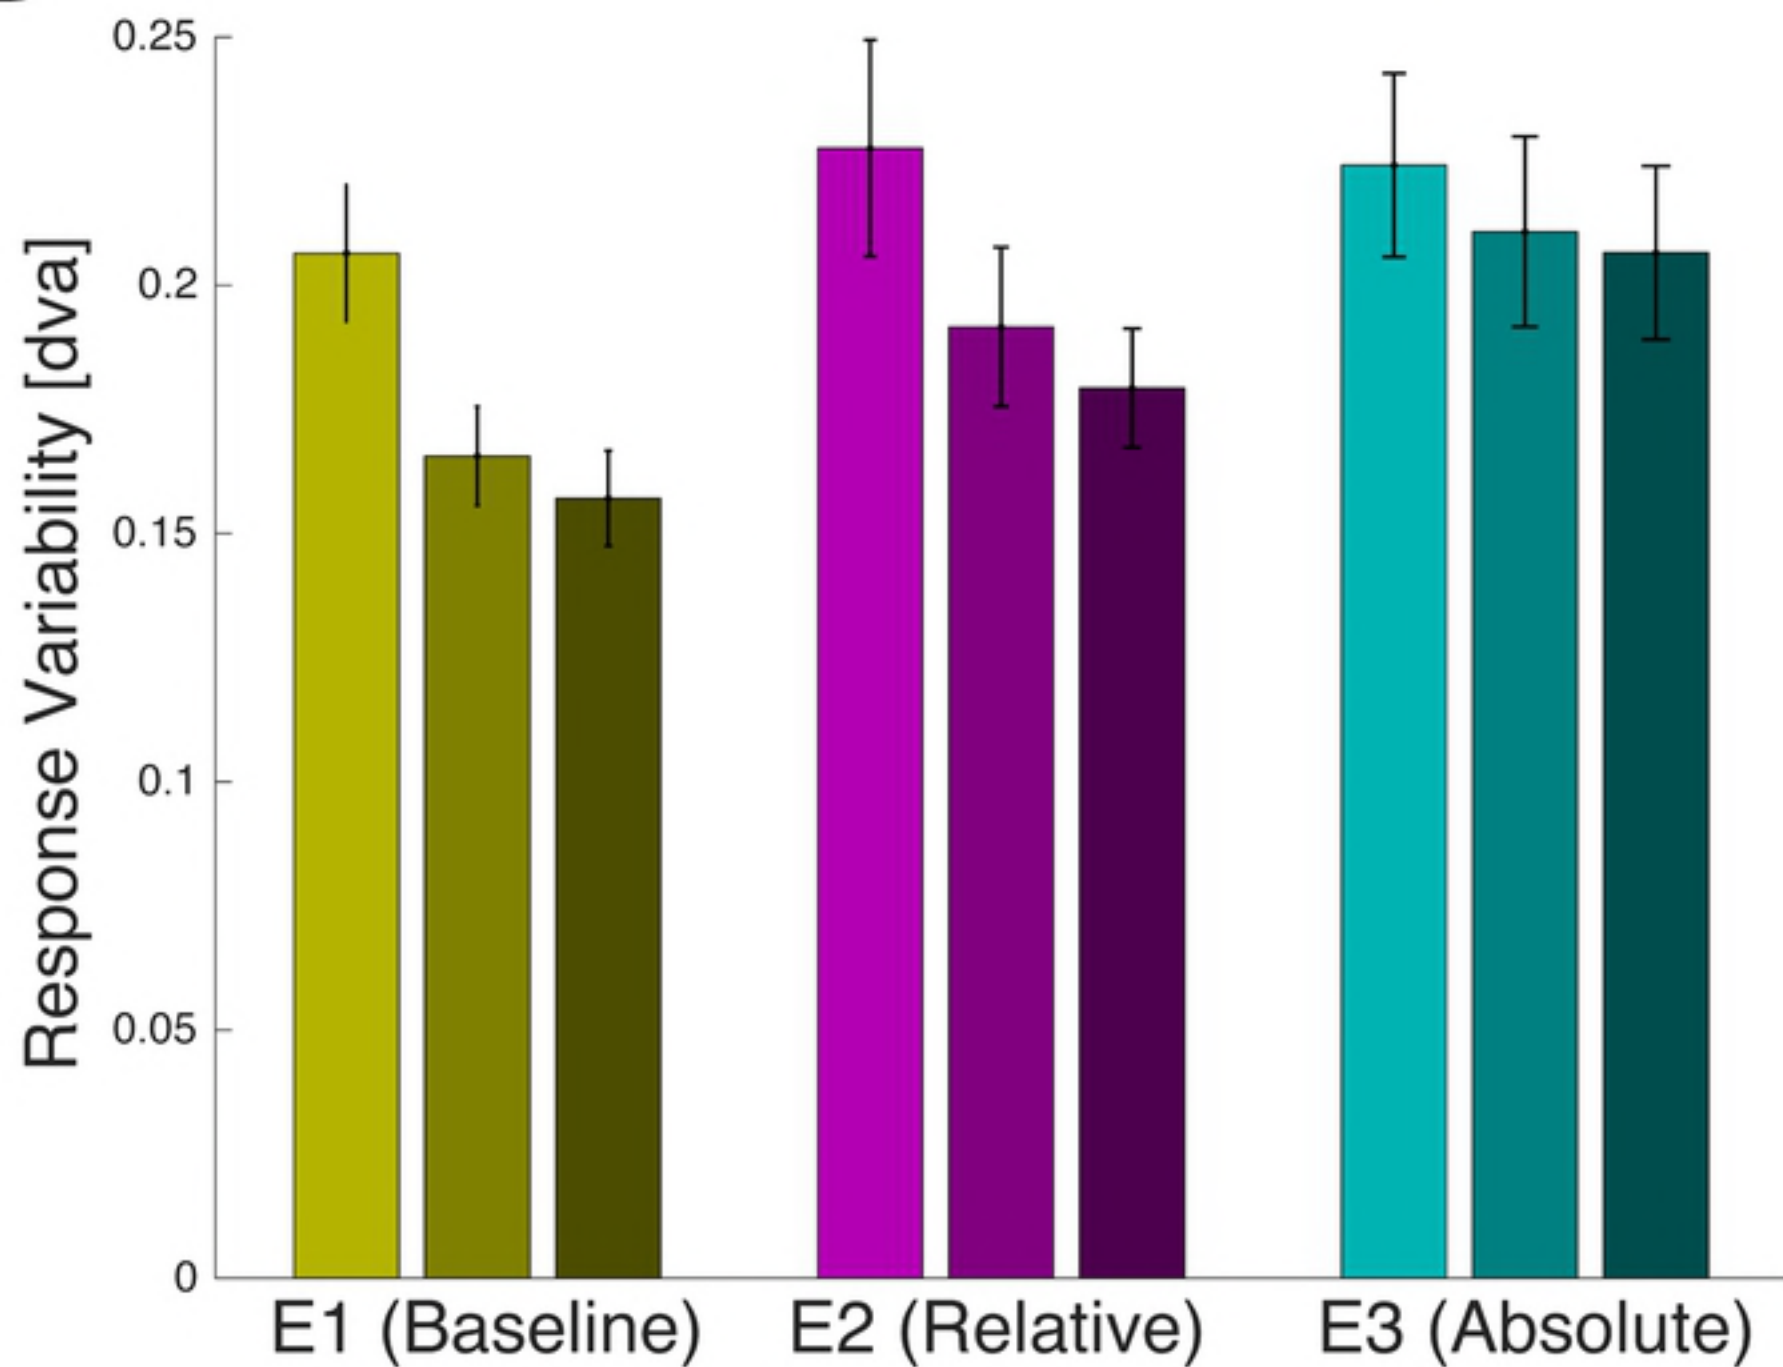

A

No Saccade

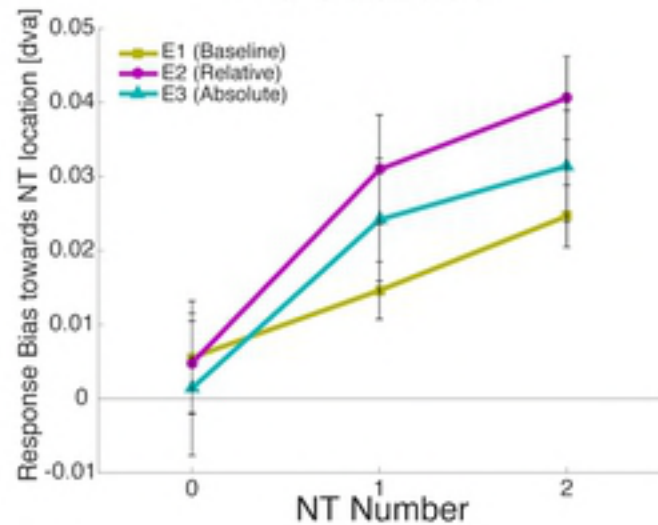

B

On opposite sides

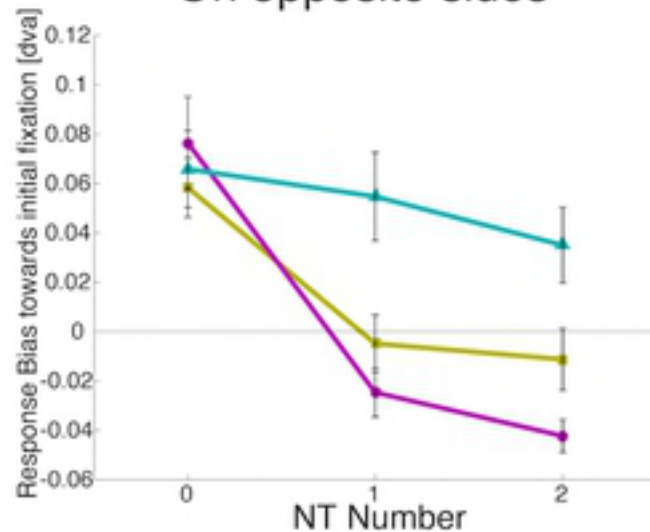

C

On the same side

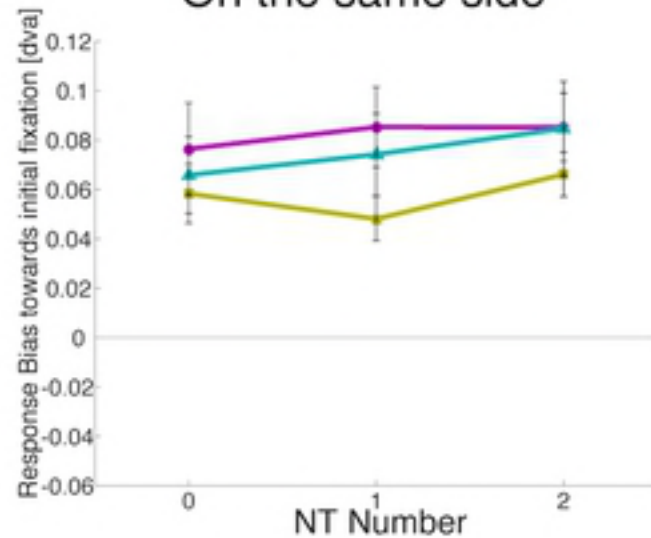

Source: http://biorxiv.org/content/10.1101/351833v1.full.pdf
